1 **Substrate-mediated regulation of the arginine transporter of *Toxoplasma gondii***

2

3 Esther Rajendran<sup>1</sup>, Morgan Clark<sup>1</sup>, Cibelly Goulart<sup>1,2</sup>, Birte Steinhöfel<sup>1,3</sup>, Erick T. Tjhin<sup>1,2</sup>,

4 Nicholas C. Smith<sup>1,2</sup>, Kiaran Kirk<sup>1\*</sup>, Giel G. van Dooren<sup>1\*</sup>

5

6 <sup>1</sup> Research School of Biology, Australian National University, Acton, ACT, 2601, Australia.

7 <sup>2</sup> School of Life Sciences, University of Technology Sydney, Broadway, NSW, 2007,

8 Australia.

9 <sup>3</sup> Present address: Humboldt University Berlin, Berlin, Germany.

10

11 \* email: [kiaran.kirk@anu.edu.au](mailto:kiaran.kirk@anu.edu.au); [giel.vandooren@anu.edu.au](mailto:giel.vandooren@anu.edu.au).

12

13

14 **ABSTRACT**

15 **Intracellular parasites, such as the apicomplexan *Toxoplasma gondii*, are adept at**  
16 **scavenging nutrients from their host. However, there is little understanding of how**  
17 **parasites sense and respond to the changing nutrient environments they encounter during**  
18 **an infection. *TgApiAT1*, a member of the apicomplexan ApiAT family of amino acid**  
19 **transporters, is the major uptake route for the essential amino acid L-arginine (Arg) in**  
20 ***T. gondii*. Here, we show that the abundance of *TgApiAT1*, and hence the rate of uptake**  
21 **of Arg, is regulated by the availability of Arg in the parasite’s external environment,**  
22 **increasing in response to decreased [Arg]. Using a luciferase-based ‘biosensor’ strain of**  
23 ***T. gondii*, we demonstrate that parasites vary the expression of *TgApiAT1* in different**  
24 **organs within their host, indicating that parasites are able to modulate *TgApiAT1*-**  
25 **dependent uptake of Arg as they encounter different nutrient environments *in vivo*.**  
26 **Finally, we show that Arg-dependent regulation of *TgApiAT1* expression is post-**  
27 **transcriptional, mediated by an upstream open reading frame (uORF) in the *TgApiAT1***  
28 **transcript, and we provide evidence that the peptide encoded by this uORF is critical for**  
29 **mediating regulation. Together, our data reveal the mechanism by which an**  
30 **apicomplexan parasite responds to changes in the availability of a key nutrient.**

31

## 32 INTRODUCTION

33 Apicomplexans are a phylum of intracellular parasites that include the causative agents of  
34 malaria (*Plasmodium* spp.) and toxoplasmosis (*Toxoplasma gondii*). The proliferation of  
35 parasites in their hosts, and their progression through their often complex life cycles, is  
36 dependent on nutrients scavenged from the host [1-3]. Apicomplexans encounter different  
37 nutrient conditions as they proliferate within, and move between, hosts, and this is reflected in  
38 differences in the metabolism of different parasite life-stages; e.g., hepatocyte stages of  
39 *Plasmodium* parasites rely on the biosynthesis of haem and fatty acids, whereas the intra-  
40 erythrocytic parasite stages scavenge these from the host [4, 5]. Although early studies  
41 suggested that parasite metabolism is ‘hard-wired’ and resistant to adapting to changes in  
42 nutrient conditions [6], there is growing evidence that parasites sense and respond to changes  
43 in the nutrient status of their hosts [3]. For example, *Plasmodium* blood-stage parasites  
44 modulate their proliferation in response to the caloric intake of their hosts, and can enter a  
45 dormant state in response to limitation of the essential amino acid isoleucine [7, 8].

46 In some instances, the ability of parasites to sense changes in external nutrient levels is key to  
47 their differentiation into new life stages. For example, limitation of lysophosphatidylcholine  
48 induces *Plasmodium falciparum* parasites to differentiate into the transmitted sexual stages in  
49 the human host [9], and the high levels of linoleic acid that *T. gondii* parasites encounter in the  
50 intestines of felids induces parasite differentiation into the sexual stages [10]. The depletion of  
51 the amino acid arginine (Arg), which may be caused by host immune responses [11], is thought  
52 to lead to differentiation of the disease-causing tachyzoite stage of *T. gondii* into the dormant,  
53 cyst-forming bradyzoite stage [12]. Despite the importance of nutrient sensing in parasite  
54 proliferation and differentiation, the mechanisms by which parasites sense and respond to the  
55 availability of nutrients are largely unknown.

56 The uptake of nutrients by *T. gondii* parasites is mediated primarily by plasma membrane  
57 transporters [13]. We recently characterised a family of plasma membrane amino acid  
58 transporters that are found throughout apicomplexans and have termed these the Apicomplexan  
59 Amino acid Transporter (ApiAT) family [14]. We have demonstrated that one member of this  
60 family, *TgApiAT1*, is an Arg transporter that is essential for *T. gondii* virulence [15].

61 In this study, we have investigated the ability of *T. gondii* parasites to sense and respond to the  
62 Arg levels that they encounter in their host. We report Arg-dependent regulation of *TgApiAT1*  
63 expression, and demonstrate that this process is mediated by an upstream open reading frame  
64 (uORF) in the *TgApiAT1* transcript. We also present evidence, obtained using a luciferase-  
65 based ‘biosensor’ strain of *T. gondii*, that parasites vary the expression of *TgApiAT1* in  
66 different organs within their host. Our data demonstrate how *T. gondii* parasites are able to  
67 sense and respond to changes in the abundance of a key nutrient, as well as illustrating their  
68 ability to do so within the course of an infection.

69

## 70 **RESULTS**

### 71 **Regulation of *TgApiAT1* protein abundance and parasite arginine uptake.**

72 To investigate whether the abundance of *TgApiAT1* is dependent upon Arg availability, we  
73 introduced a haemagglutinin (HA<sub>3</sub>) epitope tag into the open reading frame of the *TgApiAT1*  
74 genomic locus. The resultant *TgApiAT1*-HA<sub>3</sub>-expressing parasites were grown in modified  
75 Roswell Park Memorial Institute 1640 (RPMI) medium in which [Arg] ranged from 10 μM to  
76 5 mM. Western blotting revealed that the abundance of *TgApiAT1*-HA<sub>3</sub> varied with [Arg],  
77 with *TgApiAT1*-HA<sub>3</sub> most abundant in parasites grown at low [Arg] (**Figure 1A**).

78 Low [Arg] conditions have been linked to formation of the latent bradyzoite stage of *T. gondii*  
79 [12]. We measured *TgApiAT1*-HA<sub>3</sub> abundance in Type II Prugninaud strain *T. gondii* parasites,  
80 which readily form bradyzoites, and observed regulation of *TgApiAT1*-HA<sub>3</sub> levels in response  
81 to variation in [Arg] but no variation of *TgApiAT1*-HA<sub>3</sub> levels in response to pH-mediated  
82 bradyzoite induction (**Figure 1B**). This indicates that *TgApiAT1* regulation is not related to  
83 the parasite's general bradyzoite differentiation response.

84 To assess the kinetics of the Arg-dependence of *TgApiAT1*-HA<sub>3</sub> expression, we switched  
85 *TgApiAT1*-HA<sub>3</sub> parasites grown at 50  $\mu$ M Arg to medium containing 1.15 mM Arg for 3-24  
86 hr. *TgApiAT1*-HA<sub>3</sub> protein levels decreased within 3 hr of the switch (**Figure 1C**). In the  
87 converse experiment, when *TgApiAT1*-HA<sub>3</sub> parasites were switched from medium containing  
88 1.15 mM Arg to medium containing 50  $\mu$ M Arg, *TgApiAT1*-HA<sub>3</sub> protein levels increased  
89 within 3 hr of the switch (**Figure 1D**). These data reveal that *T. gondii* parasites change the  
90 abundance of their major Arg transporter in response to the [Arg] they encounter in their growth  
91 medium, doing so within hours.

92 To assess whether the abundance of other proteins changed upon changes to [Arg] in the growth  
93 medium, we grew parasites in media containing either 50  $\mu$ M or 1.15 mM Arg and extracted  
94 proteins for quantitative proteomics using sequential window acquisition of all theoretical  
95 fragment ion spectra mass spectrometry (SWATH-MS; [16]). This revealed that *TgApiAT1*  
96 was the only protein for which abundance was significantly increased beyond a log<sub>2</sub> fold  
97 change of 2 in the 50  $\mu$ M compared to the 1.15 mM condition (**Figure 1E**; **Table S1**;  $P < 0.05$ ).

98 To establish whether changes in *TgApiAT1* abundance correlate with changes in Arg uptake  
99 by the parasite, we grew parasites at a range of [Arg] and measured *TgApiAT1*-dependent  
100 [<sup>14</sup>C]-labelled Arg uptake. In parasites grown at 10  $\mu$ M Arg the initial rate of Arg uptake was  
101 25-fold higher than in parasites grown at 1 mM Arg (**Figure 1F**; **Figure S1**).

102

103 **The 5' region of the *TgApiAT1* gene regulates *TgApiAT1* protein abundance.**

104 The expression of many proteins is mediated by genetic information encoded upstream (5') of  
105 the start codon. To test whether the 5' region of the gene encoding *TgApiAT1* is important for  
106 regulation, we measured *TgApiAT1*-HA<sub>3</sub> abundance in a strain in which *TgApiAT1*-HA<sub>3</sub> was  
107 expressed from the  $\alpha$ -tubulin promoter and in which the native *TgApiAT1* gene had been  
108 knocked out [15]. We grew this strain at 10  $\mu$ M, 50  $\mu$ M and 1 mM Arg. Western blotting  
109 revealed no variation in *TgApiAT1*-HA<sub>3</sub> abundance (**Figure 2A**), indicating that the 5' region  
110 of the *TgApiAT1* coding sequence is necessary for Arg-dependent regulation of *TgApiAT1*.

111 To determine whether the 5' region of the gene encoding *TgApiAT1* is sufficient to mediate  
112 Arg-dependent regulation, we expressed a nanoLUC luciferase (nanoLUC) reporter enzyme  
113 from the *TgApiAT1* 5' region in a strain that expressed a firefly luciferase (fLUC) reporter  
114 from the  $\alpha$ -tubulin 5' region (**Figure 2B**). We grew this 'dual reporter' strain at [Arg] ranging  
115 from 10  $\mu$ M to 5 mM and measured nanoLUC- and fLUC-dependent luminescence. NanoLUC-  
116 dependent luminescence decreased with increasing [Arg], whereas fLUC-dependent  
117 luminescence remained unchanged (**Figure S2**). This enabled fLUC luminescence to be used  
118 as a normalising factor, with the nanoLUC:fLUC luminescence ratio providing a measure of  
119 Arg-dependent regulation mediated by the 5' region of the gene encoding *TgApiAT1*. There  
120 was a significant decrease in the nanoLUC:fLUC ratio as [Arg] increased, with a 55-fold  
121 decrease in parasites grown at 5 mM Arg relative to parasites grown at 10  $\mu$ M Arg (**Figure**  
122 **2B**). Expression of nanoLUC from the  $\alpha$ -tubulin 5' region revealed no Arg-dependent  
123 regulation (**Figure S2**), ruling out the possibility that nanoLUC expression is itself Arg-  
124 dependent. We conclude that the 5' region of the gene encoding *TgApiAT1* is both *necessary*  
125 and *sufficient* to mediate Arg-dependent regulation of the *TgApiAT1* protein.

126

127 ***Tg*ApiAT1 abundance is regulated by the availability of other nutrients, including lysine,**  
128 **in an opposite manner to arginine.**

129 Next, we asked whether *Tg*ApiAT1 expression is regulated by the availability of other nutrients.  
130 We measured the abundance of *Tg*ApiAT1-HA<sub>3</sub> in parasites grown in media containing from  
131 62.5 μM to 1 mM L-lysine (Lys) at a constant 50 μM Arg. We observed increased protein  
132 abundance with increased [Lys] (**Figure 3A**), the *opposite* effect to what was observed with  
133 changing [Arg]. Similarly, when the dual reporter strain was grown in media ranging from 62.5  
134 μM to 1 mM Lys and a constant 50 μM Arg, the nanoLUC:fLUC ratio increased with  
135 increasing [Lys] (**Figure 3B; Figure S3A**). To investigate this further, we measured the  
136 nanoLUC:fLUC luminescence ratio at a range of [Arg] at high (1 mM) or low (50 μM) Lys.  
137 At all but the lowest Arg concentration tested (*i.e.* 10 μM), the nanoLUC:fLUC luminescence  
138 ratio measured in parasites grown at high [Lys] was higher than that measured in parasites  
139 grown at low [Lys] (**Figure 3C**). Together these results indicate that [Lys] influences  
140 *Tg*ApiAT1 expression in the *opposite* manner to [Arg].

141 We examined the effects of the concentration of a range of other nutrients, including L-tyrosine  
142 (Tyr), L-glutamine (Gln) and D-glucose, on the nanoLUC:fLUC luminescence ratio in the dual  
143 reporter strain and on *Tg*ApiAT1-HA<sub>3</sub> protein abundance. At the lowest concentration of each  
144 nutrient tested, we observed decreased *Tg*ApiAT1-HA<sub>3</sub> protein abundance and a significantly  
145 decreased nanoLUC:fLUC ratio (**Figure 3D-I; P < 0.05; Figure S3B-D**). The lowest  
146 concentrations tested for Tyr and Gln were close to the minimal amount of those nutrients  
147 required for optimal parasite growth [14, 17]. This is consistent with the hypothesis that  
148 *Tg*ApiAT1 abundance can be negatively regulated through a general amino acid starvation

149 response in the parasite [17], and that this regulation is mediated by the 5' upstream region of  
150 *TgApiAT1*. These hypotheses were not further investigated here.

151 The effect of [Lys] on the expression of *TgApiAT1* was explored further. Our previous study  
152 revealed a connection between the uptake of Arg and Lys in *T. gondii*, demonstrating the  
153 presence of a cationic amino acid transporter that has a higher affinity for Lys than for Arg  
154 [15]. This transporter can take up sufficient Arg for parasite growth in the absence of  
155 *TgApiAT1* if the concentration of Lys, a competitive inhibitor of Arg uptake via the transporter,  
156 is low [15]. Our unpublished research indicates that this transporter is *TgApiAT6-1* (**Figure**  
157 **4A**; Rajendran, Fairweather, *et al.*, in preparation), another member of the *TgApiAT* family  
158 that localises to the parasite plasma membrane [14]. Using an HA-tagged *TgApiAT6-1* strain  
159 [14], we asked whether *TgApiAT6-1*-HA<sub>3</sub> abundance is regulated during growth in media  
160 containing a range of amino acid concentrations. We found that the abundance of *TgApiAT6-*  
161 *1*-HA<sub>3</sub> did not differ in any of the tested Arg or Lys concentrations (**Figure 4B-C**) although,  
162 as for *TgApiAT1*-HA<sub>3</sub>, we did observe a decrease in protein abundance at low [Gln] (**Figure**  
163 **4D**).

164 The data from **Figures 1 and 3** indicate that [Arg] and [Lys] have opposite effects on  
165 *TgApiAT1* regulation. We considered two hypotheses to explain these data:

- 166 1. That *TgApiAT1* regulation responds directly to [Lys] in the parasites.
- 167 2. That increased [Lys] in the growth medium results in increasing competition by lysine  
168 with arginine for the *TgApiAT6-1* transporter. In turn, this leads to decreased uptake of  
169 [Arg] through *TgApiAT6-1* and to lower [Arg] in the parasite, which subsequently  
170 results in an increase in *TgApiAT1* expression. In this scenario, *TgApiAT1* regulation  
171 responds only to [Arg] in the parasites.



172 To distinguish between the two possibilities, we generated a regulatable *TgApiAT6-1*  
173 (*rTgApiAT6-1*) parasite strain, in which *TgApiAT6-1* expression can be knocked down  
174 through the addition of anhydrotetracycline (ATc; **Figure S4**). We introduced a HA tag into  
175 the *rTgApiAT6-1* strain and found that *TgApiAT6-1*-HA protein was undetectable after two  
176 days growth in ATc (**Figure 4E**). We then introduced a HA tag into the *TgApiAT1* locus of  
177 the original *rTgApiAT6-1* strain and grew parasites in the absence or presence of ATc at [Arg]  
178 ranging from 50  $\mu$ M to 1 mM. *TgApiAT1*-HA<sub>3</sub> abundance decreased with increasing [Arg] in  
179 the absence of ATc (in which *TgApiAT6-1* is expressed) but remained invariant with varying  
180 [Arg] when ATc was added (and *TgApiAT6-1* was depleted; **Figure 4F**). These data are  
181 consistent with the second hypothesis – that limiting Arg-uptake through *TgApiAT6-1* leads to  
182 an increase in *TgApiAT1* expression, and that Lys-dependent upregulation of *TgApiAT1*  
183 (**Figure 3A-C**) results from reduced [Arg] in the parasite rather than increased [Lys].

184 In our previous study we found that knockout of *TgApiAT1* led to decreased Arg uptake, which  
185 is expected to lead to reduced [Arg] in the parasite [15]. To explore further the relationship  
186 between parasite [Arg] and *TgApAT1* regulation, we introduced a ‘knockout’ frameshift  
187 mutation in the *TgApiAT1* locus of the dual luciferase reporter strain, generating a strain we  
188 termed *apiATI* <sup>$\Delta$ 54-534</sup>. As demonstrated previously for parasites lacking *TgApiAT1* [14, 15],  
189 *apiATI* <sup>$\Delta$ 54-534</sup> parasites exhibited reduced proliferation over an 8-day growth assay in  
190 Dulbecco’s modified Eagle’s medium (DME, which contains 400  $\mu$ M Arg and 800  $\mu$ M Lys)  
191 but grew normally in RPMI (which contains 1.15 mM Arg and 200  $\mu$ M Lys) (**Figure S5**). We  
192 grew the *apiATI* <sup>$\Delta$ 54-534</sup> strain in modified RPMI containing 10  $\mu$ M to 5 mM Arg for 42 hr and  
193 measured the nanoLUC:fLUC luminescence ratio. In contrast to WT parasites, the  
194 nanoLUC:fLUC ratio in the *apiATI* <sup>$\Delta$ 54-534</sup> strain did not decrease with increasing [Arg] (**Figure**  
195 **4G**).

196 Taken together, the data from **Figure 4** indicate that Arg uptake through both *TgApiAT1* and  
197 *TgApiAT6-1* modulate the Arg-dependent regulation of *TgApiAT1*. The loss of *TgApiAT1*  
198 and *TgApiAT6-1*, and an increase in [Lys] in the growth medium, are all predicted to result in  
199 a depletion of cytosolic [Arg] in the parasite [15]. Our data in **Figures 3 and 4** are therefore  
200 consistent with the hypothesis that the parasite is able to sense [Arg] in its cytosol, and respond  
201 to changes in cytosolic [Arg] by regulating *TgApiAT1* expression.

202

### 203 ***T. gondii* parasites modulate *TgApiAT1* expression *in vivo*.**

204 Our data to this point indicate that *T. gondii* parasites are able to sense and respond to changes  
205 in [Arg] in their environment. We hypothesise that this enables parasites to modulate Arg  
206 uptake through *TgApiAT1* as they encounter different [Arg] during an infection. To investigate  
207 whether parasites vary their expression of *TgApiAT1 in vivo*, we infected mice with dual  
208 reporter strain parasites expressing nanoLUC from the wild type *TgApiAT1* 5' region. Seven  
209 days after infection, we measured the nanoLUC:fluc ratio in parasites extracted from a range  
210 of organs and from the peritoneal cavity. The ratio varied significantly between organs, with  
211 the highest ratios found in the liver, and the lowest in the spleen and kidneys (**Figure 5A**). The  
212 different ratios observed in parasites harvested from different organs are consistent with the  
213 parasites encountering different [Arg] in these organs during infection. Comparison of the  
214 nanoLUC:fluc luminescence ratios in each organ to those measured in the *in vitro*  
215 experiments indicate that *T. gondii* parasites encounter an [Arg] range of ~10-100  $\mu\text{M}$  *in vivo*  
216 (**Figure 5B**).

217

### 218 ***TgApiAT1* regulation is mediated by an upstream open reading frame.**

219 Finally, we investigated the mechanism by which the 5' region of the *TgApiAT1* gene regulates  
220 *TgApiAT1* expression in response to varying [Arg]. The most common mechanism of 5'-  
221 mediated gene regulation in eukaryotes is through regulating transcript abundance [18].  
222 Quantitative real time PCR measurements of *TgApiAT1* transcript abundance in parasites  
223 grown at 50  $\mu$ M compared to 1.15 mM Arg revealed no significant differences (**Figure 6A**),  
224 indicating that Arg-dependent *TgApiAT1* regulation occurs post-transcriptionally.

225 Post-transcriptional regulation can be mediated by upstream open reading frames (uORFs) in  
226 the 5' untranslated region (5' UTR) of transcripts [19]. We examined the *TgApiAT1* 5' UTR  
227 for potential uORFs, and identified four candidate upstream ATG start codons, of which one  
228 was conserved in related the coccidian parasites *Neospora caninum* and *Sarcocystis neurona*  
229 (see below). To test whether the conserved uORF has a role in *TgApiAT1* regulation, we used  
230 a CRISPR/Cas9 genome editing strategy to convert the uORF ATG to TTG in *TgApiAT1*-  
231 HA<sub>3</sub>-expressing parasites, generating a parasite strain we termed  $\Delta$ uORF (**Figure 6B**). When  
232 this strain was exposed to varying [Arg] there was no Arg-dependent regulation of *TgApiAT1*-  
233 HA<sub>3</sub> protein levels (**Figure 6B**), implicating the conserved uORF in the Arg-dependent  
234 response. We also generated a dual reporter strain in which nanoLUC was expressed from the  
235 5' region of *TgApiAT1* lacking the uORF ATG (**Figure 6C**). We measured the  
236 nanoLUC:fluc luminescence ratio in these parasites grown at a range of [Arg]. Again, we  
237 observed no significant Arg-dependent regulation of expression from the 5' region of  
238 *TgApiAT1* (**Figure 6C**). Together, these data indicate that Arg-dependent regulation of  
239 *TgApiAT1* is uORF-mediated.

240 uORFs can regulate protein translation in a range of ways, including, in a few instances, by the  
241 peptide that is encoded by uORF [19, 20]. The peptide sequence encoded by the *TgApiAT1*  
242 uORF peptide sequence is conserved in closely related coccidian parasites such as *N. caninum*

243 and *S. neurona* (**Figure 7A**). To test whether the peptide sequence of the *TgApiAT1* uORF is  
244 important for regulating translation of the downstream main ORF, we mutated the conserved  
245 aspartate residue at position 19 of the *TgApiAT1* uORF to asparagine (D19N; a mutation  
246 mediated by a single base pair change in the transcript; **Figure 7A**) and used the mutated  
247 *TgApiAT1* 5' UTR to drive nanoLUC expression in a dual reporter strain. We grew D19N  
248 parasites in media containing a range of [Arg] and measured nanoLUC:fluc luminescence  
249 ratios. In contrast to a WT control, the nanoLUC:fluc ratio in D19N parasites did not decrease  
250 with increasing [Arg] at most concentrations tested, although we observed a slight but  
251 significant reduction in the nanoLUC:fluc ratio at 5 mM (**Figure 7B**). Expression from the  
252 *TgApiAT1* 5' UTR was, therefore, largely unresponsive to variations in [Arg] in D19N  
253 parasites, consistent with the hypothesis that the peptide sequence of the *TgApiAT1* uORF is  
254 important for Arg-dependent regulation.

255 The best characterised example of uORF peptide-mediated regulation in the literature is the so-  
256 called arginine attenuator peptide (AAP) of fungi [21]. This peptide is encoded by the uORF  
257 of the gene encoding carbamoyl phosphate synthetase (*Arg2*), an arginine biosynthesis enzyme.  
258 Like the uORF peptide of *TgApiAT1*, the AAP is responsive to Arg, and mediates repression  
259 of the downstream open reading frame under arginine-replete conditions [22]. The *TgApiAT1*  
260 uORF peptide has some sequence similarity to the AAP from *Saccharomyces cerevisiae* and  
261 *Neurospora crassa*, including in the conserved aspartate that is critical for both *TgApiAT1*  
262 uORF and AAP function (**Figure 7A-B**; [21]). To test whether the *S. cerevisiae* (*ScAAP*) can  
263 replace the function of the *TgApiAT1* uORF peptide, we expressed nanoLUC from a modified  
264 *TgApiAT1* 5' region in which the native uORF was replaced by a uORF encoding *ScAAP* in a  
265 dual reporter strain. We grew the resultant strain at a range of [Arg] and measured the  
266 nanoLUC:fluc ratio. We observed a small but significant decrease in the nanoLUC:fluc  
267 ratio with increasing [Arg], most noticeably at the highest [Arg] tested (**Figure 7C**).

268 The *TgApiAT1* uORF peptide is larger (33 amino acids) than *ScAAP* (25 amino acids). We  
269 generated a ‘hybrid’ uORF that encoded the first seven and last two amino acids of the  
270 *TgApiAT1* uORF either side of the *ScAAP*, generating a peptide of the same length as the  
271 *TgApiAT1* uORF, and incorporated this into the *TgApiAT1* 5’ region driving nanoLUC in a  
272 dual reporter strain. We measured the nanoLUC:fluc ratio at a range of [Arg] and observed  
273 a significant decrease in the ratio with increased [Arg] (**Figure 7D**). Together, these data  
274 indicate that *ScAAP* can partially complement the function of the *TgApiAT1* uORF in  
275 mediating Arg-dependent regulation in *T. gondii*, suggesting that similar mechanisms of  
276 peptide sequence-dependent regulation may be occurring.

277

## 278 **DISCUSSION**

279 This paper describes what is, to our knowledge, the first example of substrate-mediated  
280 regulation of a transporter in apicomplexan parasites. It adds to a growing body of literature on  
281 the ability of apicomplexan parasites to sense and respond to changes in nutrient availability  
282 [7-10]. Our data indicate that *T. gondii* parasites can sense [Arg] in their environment, and  
283 respond by regulating the abundance of the Arg transporter *TgApiAT1*. The ability of the  
284 parasite to regulate *TgApiAT1* abundance may contribute to enabling the parasite to take up  
285 sufficient Arg to facilitate its proliferation as it encounters variable [Arg] across the course of  
286 an infection, and may play a role in the ability of *T. gondii* to infect a broad range of cell types  
287 in different hosts.

288 Arg uptake into *T. gondii* is mediated by the combined action of *TgApiAT1*, a selective Arg  
289 transporter, and *TgApiAT6-1*, a broad cationic amino acid transporter that is particularly  
290 important for Lys uptake into the parasite ([15]; Rajendran, Fairweather *et al.* unpublished).  
291 *TgApiAT6-1* is constitutively expressed, regardless of the cationic amino acid concentrations

292 that the parasites encounters (**Figure 4**), whereas *TgApiAT1* abundance is influenced in an  
293 antagonistic manner by the concentrations of Arg and Lys in the growth medium (**Figure 1**;  
294 **Figure 3**), and is expressed at different levels in different organs during infection (**Figure 5**).  
295 We hypothesise that *TgApiAT1* regulation enables *T. gondii* parasites to respond to different  
296 [Arg] that parasites encounter in different *in vivo* environments, enabling parasites to modulate  
297 Arg uptake from the host cell, thereby exerting tight control over their intracellular [Arg].

298 Regulation of cationic amino acid transporters in response to the availability of their substrates  
299 is observed in a range of organisms, including mammals and the protozoan parasite *Leishmania*  
300 *donovani* [23, 24]. A recent study by Augusto and colleagues demonstrated that *T. gondii*-  
301 mediated depletion of [Arg] in mammalian host cells resulted in increased abundance of the  
302 CAT1 cationic amino acid transporter of mammalian host cells [25]. Our data indicate an  
303 additional layer of complexity in mediating Arg acquisition by the parasite, with parasites able  
304 to modulate the amount of Arg that they take up from their host by regulating the level of  
305 expression of their primary Arg uptake transporter.

306 Arg and Lys were not the only nutrients found to regulate the abundance of *TgApiAT1*;  
307 *TgApiAT1* abundance decreased in response to decreased levels of glucose, and the amino  
308 acids glutamine and tyrosine (**Figure 3**). This occurred at concentrations of these nutrients that  
309 are close to, or below, the levels required for optimal parasite growth [14, 17]. Thus, in addition  
310 to being regulated by an Arg-specific mechanism, *TgApiAT1* abundance may be regulated as  
311 part of a more general starvation response. The response of *T. gondii* parasites to glutamine  
312 starvation has some similarities to the GCN2-dependent translational regulation that occurs  
313 during the starvation response of mammalian cells [17]. The putative starvation response was  
314 observed both when measuring *TgApiAT1* protein abundance, and in a strain in which  
315 nanoLUC was driven by the 5' region of the *TgApiAT1* gene. This is consistent with the

316 starvation response being mediated by the 5' region of *TgApiAT1*. It remains to be determined  
317 whether this process is translationally mediated, and whether there is functional overlap  
318 between this general starvation response and the specific Arg-dependent response.

319 Our data indicate that parasites vary the expression of *TgApiAT1* in different organs during a  
320 mouse infection (**Figure 5**), which may reflect differences in host Arg metabolism and,  
321 consequently, [Arg] in these organs. Several host cell enzymes catalyse reactions for which  
322 Arg is a substrate. The enzyme arginase catalyses the conversion of Arg to ornithine. Arginase  
323 activity is particularly high in the liver of mammals [26], which may explain why parasites  
324 encounter low levels of Arg in this organ. Parasites may also encounter different [Arg] across  
325 the course of an infection. Host cell nitric oxide synthases, including endothelial nitric oxide  
326 synthase (eNOS) and inducible nitric oxide synthase (iNOS), catalyse the conversion of Arg to  
327 nitric oxide (NO). eNOS is expressed in a range of cell types, and is upregulated in response  
328 to *T. gondii* infection [27], and iNOS is upregulated in an interferon  $\gamma$ -mediated innate immune  
329 response that occurs upon *T. gondii* infection [28]. Having established a means of estimating  
330 the [Arg] that parasites encounter *in vivo* (**Figure 5**), it will now be of interest to determine  
331 whether *TgApiAT1* expression changes across the course of an infection in response to the  
332 upregulation of Arg-dependent enzymes such as eNOS and iNOS, and whether *TgApiAT1*  
333 regulation plays a role in enabling parasite proliferation and dissemination to different organs  
334 and tissues as an infection progresses.

335 We demonstrated that Arg-dependent regulation of *TgApiAT1* is mediated by a uORF in the  
336 *TgApiAT* transcript (**Figures 6-7**). uORFs appear to be abundant in *T. gondii* transcripts [29],  
337 and the uORF of *TgApiAT1* represents the first characterised example of a functional uORF in  
338 these parasites. Our data indicate that the peptide encoded by the uORF plays a role in the Arg-  
339 dependent regulation of *TgApiAT1* expression (**Figure 7**). This is one of only a few known

340 cases in which the peptide of a uORF appears to be critical for regulating translation of the  
341 downstream main ORF [19]. The best studied example of peptide-dependent uORF regulation  
342 is the AAP of fungi, which regulates the Arg-dependent translation of the arginine biosynthesis  
343 enzyme Arg2 [30]. The AAP mediates ribosome stalling on the Arg2 transcript in Arg-replete  
344 conditions, possibly by blocking the ribosome exit tunnel [22, 31, 32]. The sequence of the  
345 *TgApiAT1* uORF resembles that of the AAP (**Figure 7A**), with one of the conserved residues  
346 being critical for *TgApiAT1* uORF function, and the yeast AAP being partially functional in *T.*  
347 *gondii* (**Figure 7B-D**). Given that *T. gondii* and fungi are separated by ~1.5 billion years of  
348 evolution, and that the *TgApiAT1* uORF peptide appears restricted to *T. gondii* and its closest  
349 relatives, a conserved function between these uORFs would represent a remarkable example  
350 of convergent evolution.



## 351 **Methods**

352 **Parasite culture.** Parasite cultures were maintained in human foreskin fibroblasts (a kind gift  
353 from Holger Schlüter, Peter MacCallum Cancer Centre) in a humidified 37°C incubator at  
354 5 % CO<sub>2</sub>. Host cells were checked periodically for *Mycoplasma* infection. Unless otherwise  
355 indicated in the text, parasites were cultured in RPMI supplemented with 1 % (v/v) foetal calf  
356 serum, 2 mM glutamine, 50 U/ml penicillin, 50 µg/ml streptomycin, 10 µg/ml gentamicin,  
357 and 0.25 µg/ml amphotericin b, as described [15]. For all ‘homemade’ media where we  
358 varied the concentrations of nutrients, we used 1% (v/v) dialysed foetal calf serum. Where  
359 applicable, ATc was added to a final concentration of 0.5 µg/ml. Experiments to measure the  
360 effects of a range of [Arg] on *TgApiAT1*-HA<sub>3</sub> abundance or *apiAT1* 5’-nanoLUC activity  
361 were performed in RPMI containing 200 µM Lys, unless otherwise indicated. Experiments to  
362 measure the effects of [Lys], [Tyr], [Gln] and [D-glucose] on *TgApiAT1* regulation were  
363 performed in medium containing 50 µM Arg. Plaque assays were performed in 25 cm<sup>2</sup> tissue  
364 culture flasks, with 500 parasites added to a flask. Parasites were grown for 8 days before  
365 being stained in a solution of 2 % (w/v) crystal violet, 20 % (w/v) ethanol and 0.8 % (w/v)  
366 ammonium acetate. To induce bradyzoite formation,  $1.4 \times 10^6$  tachyzoites were inoculated  
367 into a 25 cm<sup>2</sup> tissue culture flask with confluent human foreskin fibroblasts and allowed to  
368 proliferate for 20 hr in standard growth medium. The growth medium was replaced with  
369 alkaline RPMI supplemented with 25 mM HEPES (pH 8.2-8.4), and the infected host cells  
370 were then cultured for a further six days at ambient CO<sub>2</sub> levels. Intracellular bradyzoites were  
371 mechanically egressed from host cells using a 26 gauge needle, then further disrupted using a  
372 30 gauge needle before sample preparation for SDS-PAGE.

373 **Ethics Statement.** All animal research was conducted in accordance with the National  
374 Health and Medical Research Council’s Australian Code for the Care and Use of Animals for

375 Scientific Purposes, and the Australian Capital Territory Animal Welfare Act 1992. Mice  
376 were maintained and handled in accordance with protocols approved by the Australian  
377 National University Animal Experimentation Ethics Committee (protocol number A2016/42).

378 **Mouse infections.** Freshly egressed, dual reporter strain parasites were filtered through a 3  
379  $\mu\text{m}$  polycarbonate filter, washed once in phosphate-buffered saline (PBS), and resuspended to  
380  $1 \times 10^4$  parasites/ml in PBS. 6-8 week-old, female Balb/c mice were inoculated  
381 intraperitoneally with  $1 \times 10^3$  parasites using a 26-gauge needle. Mice were weighed  
382 regularly and monitored for symptoms of toxoplasmosis (weight loss, ruffled fur, lethargy  
383 and hunched posture). At day 6, mice were imaged using an IVIS imaging system to confirm  
384 infection, as described [33]. Briefly, mice were injected intraperitoneally with 200  $\mu\text{l}$  of 15  
385 mg/ml D-luciferin in PBS, anaesthetised with 2.5 % isoflurane in oxygen in an anaesthetic  
386 chamber using an XGI-8 anaesthesia system, and imaging was performed on an IVIS  
387 Spectrum imaging system 10 min post-injection. Anaesthesia was maintained during imaging  
388 by application of 2.5% isoflurane in oxygen via a nose cone. All mice were euthanised at  
389 day 7 of the experiment and dissected to remove organs for dual luciferase assay  
390 measurements, as described below. We also euthanised and analysed two uninfected mice to  
391 determine background luminescence levels found in each tested organ.

392 **Generation of genetically modified *T. gondii* strains.** To incorporate a 3xHA tag into the  
393 *TgApiAT1* locus, we adopted a CRISPR/Cas9 genome editing strategy. We introduced a  
394 single guide RNA (gRNA) targeting the 3' region of the *TgApiAT1* locus into the vector  
395 pSAG1::Cas9-U6::sgUPRT (Addgene plasmid # 54467; [34]) using Q5 site-directed  
396 mutagenesis (New England Biolabs) with the primers ApiAT1 3' gRNA fwd and generic rvs  
397 (Table S2), as described previously [34]. We generated a donor DNA containing the 3xHA-  
398 tag flanked by sequence homologous to the *TgApiAT1* locus either side of the *TgApiAT1*

399 stop codon as a gBlock (IDT; **Table S2**). We amplified the ‘*Tg*ApiAT1-HA<sub>3</sub>’ gBlock DNA  
400 (IDT) by polymerase chain reaction (PCR) using the primers ApiAT1 3’ edit fwd and rvs  
401 (**Table S2**). We co-transfected the gRNA/Cas9-GFP-expressing vector and the donor DNA  
402 into TATi $\Delta$ *ku80* [35], Prugniaud $\Delta$ *ku80* $\Delta$ *hxgprt/ldh2*-GFP [36], or r*Tg*ApiAT6-1 strain  
403 parasites, and sorted GFP-expressing clones 2-3 days post-transfection, as described [14, 37].

404 To generate the dual luciferase reporter strain, we first generated a strain that expressed  
405 firefly luciferase (fLUC) under the control of the *T. gondii*  $\alpha$ -tubulin 5’ region. We digested  
406 the vector pTub8-rsLUC (a kind gift from Boris Striepen, U. Penn) with *Spe*I and *Not*I and  
407 ligated this into the equivalent sites of pDTG [38], a vector that encodes a pyrimethamine-  
408 resistance marker. We transfected this plasmid into RH $\Delta$ *hxgprt* [39] strain parasites, selected  
409 on pyrimethamine, and obtained clonal parasites by limiting dilution. This generated a strain  
410 that we termed the  $\alpha$ tub 5’-fLUC strain, which constitutively expressed fLUC from the  $\alpha$ -  
411 tubulin 5’ region. We next set about generating a plasmid that expressed nanoLUC from the  
412 *Tg*ApiAT1 5’ region. First, we generated a vector expressing firefly luciferase (fLUC) under  
413 the control of the *Tg*ApiAT1 5’ region. We amplified fLUC with the primers fLUC fwd and  
414 fLUC rvs (**Table S2**) using the LT-3 plasmid [40] (a kind gift from Alex Maier, ANU) as  
415 template. We digested the resulting product with *Bgl*III and *Avr*II and ligated this into the  
416 equivalent sites of the vector pUgCTH<sub>3</sub> [15], generating a vector we termed pUgCT-fLUC-  
417 HA<sub>3</sub>. We PCR amplified the 1.2 kb region upstream of the *Tg*ApiAT1 5’ UTR (*i.e.* upstream  
418 of the transcript start site) using the primers ApiAT1 5’ fwd and rvs (**Table S2**), digested the  
419 product with *Spe*I and *Asi*SI and ligated into the equivalent sites of pUgCT-fLUC-HA<sub>3</sub>. We  
420 then amplified the 5’ UTR of the *Tg*ApiAT1 gene using the ApiAT1 5’ UTR fwd and rvs  
421 primers (**Table S2**), digested the resulting product with *Sbf*I and *Asi*SI, and ligated this into  
422 the equivalent sites of the pUgCT-fLUC-HA<sub>3</sub> vector, terming the resultant vector pUgC-  
423 apiAT1 5’-fLUC-HA<sub>3</sub>. Next, we amplified nanoLUC using the nanoLUC fwd and rvs

424 primers (**Table S2**) and the plasmid pTubNluc-AID-2xHA-DHFR (a kind gift from Boris  
425 Striepen, U. Penn) as template. We digested the resulting product with *AsiSI* and *AvrII*, and  
426 ligated this into the equivalent site of pUgC-apiAT1 5'-fLUC-HA<sub>3</sub>, generating a vector we  
427 termed pUgC-apiAT1 5'-nanoLUC-HA<sub>3</sub>. The resultant plasmid encodes nanoLUC under  
428 control of the *TgApiAT1* 5' region. We transfected this plasmid into the  $\alpha$ tub 5'-fLUC  
429 parasite strain, selected on chloramphenicol, and obtained clonal parasites by limiting  
430 dilution. We termed the resultant strain the 'dual reporter strain'.

431 To generate a *T. gondii* strain in which we could knock down expression of *TgApiAT6-1*, we  
432 replaced the native *TgApiAT6-1* promoter region with an ATc-regulatable promoter using a  
433 double homologous recombination approach. First, we amplified the 5' flank of *TgApiAT6-1*  
434 with the primers *ApiAT6-1* 5' flank fwd and rvs (**Table S2**). We digested the resulting  
435 product with *PspOMI* and *NdeI* and ligated into the equivalent sites of the vector pPR2-HA<sub>3</sub>  
436 [41], generating a vector we termed pPR2-HA<sub>3</sub>(*ApiAT6-1* 5' flank). Next, we amplified the  
437 3' flank with the primers *ApiAT6-1* 3' flank fwd and rvs (**Table S2**). We digested the  
438 resulting product with *BglII* and *NotI* and ligated into the equivalent sites of the vector pPR2-  
439 HA<sub>3</sub>(*ApiAT6-1* 5' flank) vector. We linearised the resulting plasmid with *NotI* and  
440 transfected this into TATi/ $\Delta ku80$  strain parasites [35] expressing tandem dimeric Tomato  
441 RFP. We selected, on pyrimethamine, and cloned parasites by limiting dilution. We termed  
442 the resulting strain regulatable (r)*TgApiAT6-1*. To enable us to measure knockdown of the  
443 ATc-regulatable *TgApiAT6-1* protein, we integrated a HA tag into the r*TgApiAT6-1* locus by  
444 transfecting a *TgApiAT6-1*-HA 3' replacement vector, described previously [14], into this  
445 strain. To incorporate a 3xHA tag into the *TgApiAT1* locus of the r*TgApiAT6-1* strain, we  
446 adopted a CRISPR/Cas9 genome editing strategy, as described above.

447 To generate a frameshifted ‘knockout’ mutation in the *TgApiAT1* locus of the dual reporter  
448 strain, we transfected this with a plasmid expressing a gRNA targeting the *TgApiAT1* locus,  
449 sorted and cloned parasites 3 days after transfection, and verified that a successful frameshift  
450 mutation (a single base pair insertion) had occurred by sequencing the *TgApiAT1* locus, all  
451 as described previously [14].

452 To generate a *TgApiAT1*-HA<sub>3</sub>-expressing strain wherein the ATG start codon of the  
453 *TgApiAT1* uORF was mutated to TTG, we adopted a CRISPR/Cas9 genome editing strategy.  
454 First, we introduced a gRNA targeting the genomic locus that encoded the *TgApiAT1* 5’  
455 UTR near the uORF start codon into pSAG1::Cas9-U6::sgUPRT vector using Q5 site-  
456 directed mutagenesis with the primers *ApiAT1* uORF gRNA fwd and generic rvs (**Table S2**)  
457 as described previously [34]. We generated a donor DNA wherein the ATG of the uORF was  
458 mutated to TTG by annealing the complementary primers *ApiAT1* ΔuORF fwd and rvs  
459 (**Table S2**), and co-transfected this with the gRNA-expressing vector into *TgApiAT1*-HA<sub>3</sub>  
460 strain parasites. We sorted GFP-expressing clones 3 days post-transfection, then sequenced  
461 clones to verify successful mutation. In addition to the ATG start codon of the uORF being  
462 mutated to TTG, the clone that we characterised had an additional G to C mutation in the  
463 protospacer adjacent motif (PAM) site of the gRNA target (13 bp upstream of the ATG  
464 codon) designed to prevent gRNA-mediated Cas9 cutting the chromosome following genome  
465 modification, and an unintended G to A mutation 6 bp upstream of the start codon, likely  
466 introduced by a mutation in the donor DNA.

467 To generate a strain expressing nanoLUC from the *TgApiAT1* 5’ region in which the uORF  
468 ATG start codon was mutated to TTG, we amplified the 5’UTR of the *TgApiAT1* using the  
469 *ApiAT1* 5’ UTR fwd and rvs primers (**Table S2**), and a ‘*TgApiAT1*/ΔuORF 5’UTR’ gBlock  
470 (IDT) encoding an altered *TgApiAT1* 5’ UTR region in which the start codon of the

471 *TgApiAT1* uORF was mutated to TTG (**Table S2**). We digested the resultant PCR product  
472 with *PstI* and *AsiSI*, and ligated into the *SbfI* and *AsiSI* sites of pUgC-apiAT1 5'-nanoLUC-  
473 HA<sub>3</sub>. We transfected this vector into the  $\alpha$ tub 5'-fLUC strain, selected on chloramphenicol,  
474 and obtained clonal parasites by limiting dilution. To generate a strain expressing nanoLUC  
475 from the *TgApiAT1* 5' region wherein the native *TgApiAT1* uORF was replaced with the *S.*  
476 *cerevisiae* AAP uORF, we amplified a modified *TgApiAT1* 5'UTR containing the *S.*  
477 *cerevisiae* AAP uORF using the ApiAT1 5' UTR fwd and rvs primers (**Table S2**) and a  
478 '*TgApiAT1*/ScAAP uORF 5'UTR' gBlock (IDT; **Table S2**). We digested the resultant PCR  
479 product with *PstI* and *AsiSI*, and ligated into the *SbfI* and *AsiSI* sites of pUgC-apiAT1 5'-  
480 nanoLUC-HA<sub>3</sub>. We transfected this vector into the  $\alpha$ tub 5'-fLUC strain, selected on  
481 chloramphenicol, and obtained clonal parasites by limiting dilution. To generate a strain  
482 expressing nanoLUC from the *TgApiAT1* 5' region containing a 'hybrid' uORF consisting of  
483 the *S. cerevisiae* AAP flanked by the 5' and 3' regions of the *TgApiAT1* uORF, we amplified  
484 a modified *TgApiAT1* 5'UTR containing the hybrid *TgApiAT1* uORF using the ApiAT1 5'  
485 UTR fwd and rvs primers (**Table S2**) and a '*TgApiAT1*/hybrid uORF 5'UTR' gBlock (IDT;  
486 **Table S2**). We digested the resultant PCR product with *PstI* and *AsiSI*, and ligated into the  
487 *SbfI* and *AsiSI* sites of pUgC-apiAT1 5'-nanoLUC-HA<sub>3</sub>. We transfected this vector into the  
488  $\alpha$ tub 5'-fLUC strain, selected on chloramphenicol, and obtained clonal parasites by limiting  
489 dilution.

490 To generate a strain expressing nanoLUC from the *TgApiAT1* 5' region wherein the aspartate  
491 residue at position 19 of the uORF peptide was mutated to asparagine (D19N), we used Q5  
492 mutagenesis approach. We followed the manufacturer's instructions (New England Biolabs)  
493 using the pUgC-apiAT1 5'-nanoLUC-HA<sub>3</sub> plasmid as template, and the uORF D19 fwd and  
494 rvs primers (**Table S2**). We transfected the resultant vector into  $\alpha$ tub 5'-fLUC strain  
495 parasites, selected on chloramphenicol, and obtained clonal parasites by limiting dilution.

496 To generate a strain that expressed nanoLUC from the  $\alpha$ -tubulin 5' region, we amplified the  
497  $\alpha$ -tubulin 5' region with the primers Tub 5' fwd and rvs (**Table S2**), digested the product  
498 with *SpeI* and *AsiSI* and ligated into the equivalent sites of the pUgC-apiAT1 5'-nanoLUC-  
499 HA<sub>3</sub>, generating a vector we termed pUgC-tub 5'-nanoLUC-HA<sub>3</sub>. We transfected this  
500 plasmid into RH $\Delta$ *hxprt* strain parasites, selected on chloramphenicol, and obtained clonal  
501 parasites by limiting dilution.

502 **Quantitative real time PCR.** TATi $\Delta$ *ku80* strain parasites were cultured for 2 days in  
503 modified RPMI medium containing 50  $\mu$ M or 1.15 mM Arg. Parasites were mechanically  
504 egressed from host cells using a 26 gauge needle, then total RNA was extracted using the  
505 Isolate II RNA mini extraction kit (Bioline), according to the 'cultured cells and tissue'  
506 protocol in the manufacturer's instructions. cDNA synthesis was performed using the High-  
507 Capacity cDNA reverse transcriptase kit (Applied Biosystems) with a random primer mix  
508 and 2  $\mu$ g total RNA from each sample, according to the manufacturer's instructions.  
509 Quantitative real time PCR was performed using a LightCycler 480 system (Roche) with the  
510 LightCycler 480 SybrGreen I Master mix, following the manufacturer's instructions, and  
511 using 5  $\mu$ M primers. The LightCycler 480 conditions were as follows: 10 min preincubation  
512 at 95°C, then 45 cycles of 15 sec denaturation (95°C), 15 sec annealing (58°C), and 20 sec  
513 elongation (72°C). To detect the abundance of *TgApiAT1* transcript, we used the primers  
514 *ApiAT1* qrt int fwd and rvs (which amplified *TgApiAT1* cDNA across the intron of the  
515 transcript) and *ApiAT1* qrt 3' UTR fwd and rvs (which amplified *TgApiAT1* cDNA from the  
516 3' UTR of the transcript; **Table S2**). *TgApiAT1* transcript levels were normalised using  $\alpha$ -  
517 tubulin (Tub) and glyceraldehyde-3-phosphate dehydrogenase (GAPDH) as housekeeping  
518 transcript controls. We amplified these housekeeping controls using the primers Tub qrt fwd  
519 and rvs and GAPDH qrt fwd and rvs; **Table S2**). Raw fluorescence data were exported and  
520 analysed using LinRegPCR[42] to perform background subtraction and determine PCR



521 primer efficiency. Samples were then normalized to housekeeping controls using the Pfaffl  
522 equation ( $E_{NPT1}^{\Delta CT_{NPT1}}/E_{ref}^{\Delta CT_{ref}}$ ;  $E$ =primer efficiency,  $\Delta CT$  = difference in cycle threshold  
523 between samples grown at 1.15 mM and 50  $\mu$ M Arg, ref = housekeeping controls; [43]) and  
524 expressed as percentage relative to that at 50  $\mu$ M. Three biological replicates were performed  
525 and each reaction was done in at least triplicate.

526 **Western blotting.** Protein samples were separated using NuPAGE Bis/Tris gels, as described  
527 [15], loading  $2.5 \times 10^6$  parasite equivalents per lane. Membranes were probed with rat anti-HA  
528 antibodies (1:100 to 1:3,000 dilutions; clone 3F10, Sigma, 11867423001), rabbit anti-  
529 *TgTom40* [44] (1:2,000 dilution), mouse anti-GFP (1:1,000 dilution; Sigma, 11814460001),  
530 mouse anti-BAG1 [45] (1:250 dilution; a kind gift from Louis Weiss, Albert Einstein College  
531 of Medicine), rabbit anti-SAG1 (1:1,000 dilution; a kind gift from Michael Panas and John  
532 Boothroyd, Stanford University), or mouse anti-*TgGRA8* [46] (1:100,000 dilution; a kind gift  
533 from Gary Ward, U. Vermont) as primary antibodies, and horseradish peroxidase-conjugated  
534 goat anti-rat (1:5,000 to 1:10,000 dilutions; Santa Cruz, sc-2006, or Abcam, ab97057), goat  
535 anti-rabbit (1:5,000 to 1:10,000 dilution; Santa Cruz, sc-2004, or Abcam, ab97051), or goat  
536 anti-mouse (1:5,000 to 1:10,000 dilution; Santa Cruz, sc-2005) secondary antibodies.

537 **SWATH-MS proteomic analysis. Sample preparation.** We undertook a SWATH-MS-based  
538 quantitative proteomic approach [16] to establish whether the abundance of proteins changed  
539 in parasites grown in media containing low vs high [Arg]. We cultured RH $\Delta$ *hxgprt* strain  
540 parasites in modified DME containing 50  $\mu$ M or 1.15 mM Arg, and a constant 800  $\mu$ M Lys for  
541 two days. Our previous data indicate that 50  $\mu$ M is the minimum [Arg] required for optimal  
542 parasite growth [15], and we chose 50  $\mu$ M as the low [Arg] value (and not a lower  
543 concentration) to avoid identifying proteins that change abundance as a result of a general  
544 starvation response. We performed five replicates for each condition. Parasites were



545 mechanically egressed through a 26 gauge needle, filtered through a 3  $\mu\text{m}$  polycarbonate filter  
546 to remove host cell debris, washed in PBS, then resuspended in a lysis buffer containing 1%  
547 (w/v) sodium dodecyl sulfate (SDS), 1 mM dithiothreitol (DTT), 50 mM Tris-HCl, pH 8. SDS  
548 was removed by buffer exchange with 100 mM triethylammonium bicarbonate.

549 *Sample processing.* 100  $\mu\text{g}$  of protein from each sample was reduced in 10 mM DTT, alkylated  
550 with 20 mM iodoacetamide, then digested by trypsin for 16 hr at 37°C. Digested samples were  
551 cleaned up using a detergent removal spin column (Pierce), then dried and resuspended in 100  
552  $\mu\text{L}$  of 2% (v/v) acetonitrile with 0.1 % (v/v) formic acid. For one-dimensional information  
553 dependent acquisition (1D-IDA), 10  $\mu\text{l}$  of each sample was subjected to nanoLC MS/MS  
554 analysis using an Ultra nanoLC (Eksigent) system and Triple TOP 5600 mass spectrometer  
555 (AB Sciex). For two-dimensional (2D)-IDA, a pool was prepared from 20  $\mu\text{l}$  of each sample,  
556 and separated by high pH reverse phase fractionation on a Agilent 1260 quaternary HPLC  
557 system with a Zorbax 300Extend-C18 column, with 12 fractions collected. Each 1D-IDA and  
558 2D-IDA sample was injected onto a Captrap peptide trap (Bruker) for pre-concentration and  
559 desalting in 2% (v/v) acetonitrile with 0.1 % (v/v) formic acid, then injected into the analytical  
560 column. The reverse phase nanoLC eluent was subjected to positive ion nanoflow electrospray  
561 analysis in an IDA mode. For data independent acquisition (SWATH), 10  $\mu\text{l}$  of each sample  
562 was treated as for the IDA samples, with the reverse phase nanoLC eluent subjected to positive  
563 ion nanoflow electrospray in a data independent acquisition mode. For SWATH-MS, m/z  
564 window sizes were determined based on precursor m/z frequencies (m/z 400-1250) from the  
565 IDA data. In SWATH mode, a TOFMS survey scan was acquired (m/z 350-1,500, 0.05 sec)  
566 then 60 predefined m/z ranges were sequentially subjected to MS/MS analysis. MS/MS spectra  
567 were accumulated for 60 ms in the mass range 350-1,500 with optimised rolling collision  
568 energy.

569 *Data processing and analysis.* LC-MS/MS data from the IDA experiments were searched using  
570 ProteinPilot (v4.2; AB Sciex) against the ToxoDB GT1 proteome (ToxoDB.org). SWATH data  
571 were extracted using PeakView (v2.1) with the following parameters: the six most intense  
572 fragments of each peptide were extracted from the SWATH data sets, with shared and modified  
573 peptides excluded. Peptides with confidence  $\geq 99\%$  and FDR  $\leq 1\%$  were used for quantitation.  
574 SWATH protein peak areas were analysed using an in-house Australian Proteome Analysis  
575 Facility (APAF) program. Protein peaks were normalised to total peak area for each run, and  
576 were subjected to statistical analysis to compare relative protein peak areas between the sample  
577 groups. The data for each identified protein is presented in **Table S1**.

578 **Dual luciferase reporter assays.** To measure nanoLUC and fLUC activity in dual luciferase  
579 reporter strains, we cultured parasites in 25 cm<sup>2</sup> tissue culture flasks in the required growth  
580 medium. Before parasite inoculation, host cells and parasites were both were washed twice  
581 with PBS to remove residual media. Parasites were cultured for between 38 and 42 hr, over  
582 which time all remained intracellular. Parasites grown in 10  $\mu$ M Arg exhibited slower growth  
583 than at other [Arg] across this timeframe. To compensate for this, we inoculated more  
584 parasites into flasks containing 10  $\mu$ M Arg. On the day of the experiment, parasites were  
585 liberated from host cells by passage through a 26 gauge needle. Host cell debris were  
586 removed by filtering through a 3  $\mu$ m polycarbonate filter, and parasites were pelleted by  
587 centrifugation at  $1,500 \times g$  for 10 min. Parasites were resuspended to  $1-2 \times 10^7$  parasites/ml  
588 in PBS and 25  $\mu$ l of parasite suspension was added to wells of an OptiPlate-96 opaque, white  
589 96-well plate (PerkinElmer). To measure nanoLUC and fLUC luminescence, we used the  
590 NanoGlo Dual-luciferase reporter assays system (Promega, N1610). First, we measured  
591 fLUC activity by adding 25  $\mu$ l ONE-Glo Ex Luciferase assay buffer with added substrate to  
592 wells containing parasites, incubating for 5 min, then reading on a FluoStar Optima plate  
593 reader (BMG Labtech) using the luminescence settings without an emission filter. Next, we

594 measured nanoLUC activity by adding 25  $\mu$ l NanoDLR Stop & Go assay buffer containing  
595 1:100 diluted substrate to the parasite suspension, incubating for 5 min, then reading  
596 luminescence using the same settings as for fLUC. In each assay, we included a ‘no parasite’  
597 control (25  $\mu$ l PBS), which was subtracted from the luminescence readings of the parasite-  
598 containing wells before subsequent data analysis. To measure nanoLUC and fLUC activities  
599 in mouse organs, infected and uninfected mice were euthanised by cervical dislocation. Prior  
600 to organ harvest, intraperitoneal lavage was performed by injecting 5 ml ice-cold PBS into  
601 the intraperitoneal cavity using a 26 G needle, mixing peritoneal cavity content and  
602 subsequent aspiration of the content using 20 G needle. Next, incisions were made to open  
603 the chest cavity without damaging any organs. The spleen, liver and kidneys were harvested  
604 and placed in 2 ml ice-cold PBS. Next, the lungs were perfused by injection of 10 ml of ice-  
605 cold PBS into mouse heart ventricles. The heart, lung and brain were subsequently harvested  
606 and kept in 2 ml of ice-cold PBS. All samples were kept on ice until luminescence  
607 measurements. For luminescence measurements, all organs were homogenised using a  
608 dounce homogeniser. 25 $\mu$ l aliquots of each of the crude homogenate samples were  
609 transferred in duplicate into wells of an OptiPlate-96 opaque, white 96-well plate. NanoLUC  
610 and fLUC measurements were performed as described above. Luminescence measurements  
611 in the heart and brain of infected mice were found to be at background levels, and were not  
612 analysed further.

613 **Arg uptake experiments.** Experiments to measure uptake of [ $^{14}$ C]Arg through *Tg*ApiAT1  
614 were performed as described previously [47]. Briefly, extracellular *T. gondii* parasites were  
615 incubated in PBS containing 10 mM D-glucose, 0.1  $\mu$ Ci/ml [ $^{14}$ C]Arg, 50  $\mu$ M unlabelled Arg,  
616 and 800  $\mu$ M unlabelled Lys for a range of times. The unlabelled Lys was added to inhibit Arg  
617 uptake through *Tg*ApiAT6-1. The reaction was stopped by centrifuging the parasites through  
618 an oil mix consisting of 84% (v/v) PM125 silicone fluid and 16 % (v/v) light mineral oil. The

619 incorporated radiolabel was measured using a liquid scintillation counter (Perkin Elmer).

620 Time course data were fitted by a single exponential function and the initial rate calculated

621 from the initial slope of the curve.

622 **Statistics and reproducibility.** Unless described otherwise in the figure legends, all

623 quantitative data are presented as mean  $\pm$  SD of three or more independent experiments. All

624 non-quantitative data (western blots, plaque assays) displayed are representative images of

625 multiple independent experiments, with the number of experiments listed in the figure

626 legends. Graphs were plotted using GraphPad Prism, and statistics were also undertaken in

627 GraphPad Prism. Details of statistics are provided in the figure legends.

628 **Acknowledgements**

629 We are grateful to the students of the 2014 Biology of Parasitism Course (Marine Biological  
630 Laboratory, Woods Hole, MA) for first uncovering the Arg-mediated regulation of  
631 *TgApiAT1*, and students from the 2015 course for contributing further experimental insights  
632 into this process. We thank Gary Ward, Louis Weiss, Michael Panas, John Boothroyd, Alex  
633 Maier and Boris Striepen for sharing reagents, Cathy Gillespie for assistance with *in vivo*  
634 luminescence mouse imaging, and Harpreet Vohra and Michael Devoy for performing cell  
635 sorting. This work was supported by a Discovery Grant from the Australian Research  
636 Council to K.K. and G.v.D. (DP150102883) and a Project Grant from the Australian National  
637 Health and Medical Research Council (GNT1128911) to N.S. SWATH-MS proteomics was  
638 undertaken at the Australian Proteome Analysis Facility, with the infrastructure provided by  
639 the Australian Government through the National Collaborative Research Infrastructure  
640 Strategy (NCRIS)

641

## 642 References

- 643 1. Coppens I. Exploitation of auxotrophies and metabolic defects in *Toxoplasma* as  
644 therapeutic approaches. *Int J Parasitol.* 2014;44(2):109-20. doi:  
645 10.1016/j.ijpara.2013.09.003. PubMed PMID: 24184910.
- 646 2. Kirk K, Lehane AM. Membrane transport in the malaria parasite and its host  
647 erythrocyte. *Biochem J.* 2014;457(1):1-18. doi: 10.1042/BJ20131007. PubMed PMID:  
648 24325549.
- 649 3. Zuzarte-Luis V, Mota MM. Parasite Sensing of Host Nutrients and Environmental Cues.  
650 *Cell Host Microbe.* 2018;23(6):749-58. Epub 2018/06/15. doi:  
651 10.1016/j.chom.2018.05.018. PubMed PMID: 29902440.
- 652 4. Rathnapala UL, Goodman CD, McFadden GI. A novel genetic technique in *Plasmodium*  
653 *berghei* allows liver stage analysis of genes required for mosquito stage development  
654 and demonstrates that *de novo* heme synthesis is essential for liver stage  
655 development in the malaria parasite. *PLoS Pathog.* 2017;13(6):e1006396. Epub  
656 2017/06/16. doi: 10.1371/journal.ppat.1006396. PubMed PMID: 28617870; PubMed  
657 Central PMCID: PMC5472305.
- 658 5. Yu M, Kumar TR, Nkrumah LJ, Coppi A, Retzlaff S, Li CD, et al. The fatty acid  
659 biosynthesis enzyme FabI plays a key role in the development of liver-stage malarial  
660 parasites. *Cell Host Microbe.* 2008;4(6):567-78. doi: S1931-3128(08)00368-5 [pii]  
661 10.1016/j.chom.2008.11.001. PubMed PMID: 19064257.
- 662 6. Ganesan K, Ponmee N, Jiang L, Fowble JW, White J, Kamchonwongpaisan S, et al. A  
663 genetically hard-wired metabolic transcriptome in *Plasmodium falciparum* fails to  
664 mount protective responses to lethal antifolates. *PLoS Pathog.* 2008;4(11):e1000214.  
665 Epub 2008/11/22. doi: 10.1371/journal.ppat.1000214. PubMed PMID: 19023412;  
666 PubMed Central PMCID: PMC2581438.
- 667 7. Babbitt SE, Altenhofen L, Cobbold SA, Istvan ES, Fennell C, Doerig C, et al. *Plasmodium*  
668 *falciparum* responds to amino acid starvation by entering into a hibernatory state.  
669 *Proc Natl Acad Sci U S A.* 2012;109(47):E3278-87. doi: 10.1073/pnas.1209823109.  
670 PubMed PMID: 23112171; PubMed Central PMCID: PMC3511138.
- 671 8. Mancio-Silva L, Slavic K, Grilo Ruivo MT, Grosso AR, Modrzynska KK, Vera IM, et al.  
672 Nutrient sensing modulates malaria parasite virulence. *Nature.* 2017;547(7662):213-6.  
673 Epub 2017/07/06. doi: 10.1038/nature23009. PubMed PMID: 28678779; PubMed  
674 Central PMCID: PMC5511512.
- 675 9. Brancucci NMB, Gerdt JP, Wang C, De Niz M, Philip N, Adapa SR, et al.  
676 Lysophosphatidylcholine Regulates Sexual Stage Differentiation in the Human Malaria  
677 Parasite *Plasmodium falciparum*. *Cell.* 2017;171(7):1532-44 e15. Epub 2017/11/14.  
678 doi: 10.1016/j.cell.2017.10.020. PubMed PMID: 29129376; PubMed Central PMCID:  
679 PMC5733390.
- 680 10. Martorelli Di Genova B, Wilson SK, Dubey JP, Knoll LJ. Intestinal delta-6-desaturase  
681 activity determines host range for *Toxoplasma* sexual reproduction. *PLoS Biol.*  
682 2019;17(8):e3000364. Epub 2019/08/21. doi: 10.1371/journal.pbio.3000364. PubMed  
683 PMID: 31430281.
- 684 11. Butcher BA, Fox BA, Rommereim LM, Kim SG, Maurer KJ, Yarovinsky F, et al.  
685 *Toxoplasma gondii* rhoptry kinase ROP16 activates STAT3 and STAT6 resulting in  
686 cytokine inhibition and arginase-1-dependent growth control. *PLoS Pathog.*

- 687 2011;7(9):e1002236. doi: 10.1371/journal.ppat.1002236. PubMed PMID: 21931552;  
688 PubMed Central PMCID: PMC3169547.
- 689 12. Fox BA, Gigley JP, Bzik DJ. *Toxoplasma gondii* lacks the enzymes required for de novo  
690 arginine biosynthesis and arginine starvation triggers cyst formation. Int J Parasitol.  
691 2004;34(3):323-31. doi: 10.1016/j.ijpara.2003.12.001. PubMed PMID: 15003493.
- 692 13. Blume M, Seeber F. Metabolic interactions between *Toxoplasma gondii* and its host.  
693 F1000 Research. 2018;7:1719. doi: <https://doi.org/10.12688/f1000research.16021.1>.
- 694 14. Parker KER, Fairweather SJ, Rajendran E, Blume M, McConville MJ, Broer S, et al. The  
695 tyrosine transporter of *Toxoplasma gondii* is a member of the newly defined  
696 apicomplexan amino acid transporter (ApiAT) family. PLoS Pathog.  
697 2019;15(2):e1007577. Epub 2019/02/12. doi: 10.1371/journal.ppat.1007577. PubMed  
698 PMID: 30742695.
- 699 15. Rajendran E, Hapuarachchi SV, Miller CM, Fairweather SJ, Cai Y, Smith NC, et al.  
700 Cationic amino acid transporters play key roles in the survival and transmission of  
701 apicomplexan parasites. Nat Commun. 2017;8:14455. doi: 10.1038/ncomms14455.  
702 PubMed PMID: 28205520.
- 703 16. Gillet LC, Navarro P, Tate S, Rost H, Selevsek N, Reiter L, et al. Targeted data extraction  
704 of the MS/MS spectra generated by data-independent acquisition: a new concept for  
705 consistent and accurate proteome analysis. Mol Cell Proteomics. 2012;11(6):O111  
706 016717. Epub 2012/01/21. doi: 10.1074/mcp.O111.016717. PubMed PMID:  
707 22261725; PubMed Central PMCID: PMC3433915.
- 708 17. Konrad C, Wek RC, Sullivan WJ, Jr. GCN2-like eIF2alpha kinase manages the amino acid  
709 starvation response in *Toxoplasma gondii*. Int J Parasitol. 2014;44(2):139-46. doi:  
710 10.1016/j.ijpara.2013.08.005. PubMed PMID: 24126185; PubMed Central PMCID:  
711 PMC3946947.
- 712 18. Wray GA, Hahn MW, Abouheif E, Balhoff JP, Pizer M, Rockman MV, et al. The  
713 evolution of transcriptional regulation in eukaryotes. Mol Biol Evol. 2003;20(9):1377-  
714 419. Epub 2003/06/05. doi: 10.1093/molbev/msg140. PubMed PMID: 12777501.
- 715 19. Barbosa C, Peixeiro I, Romao L. Gene expression regulation by upstream open reading  
716 frames and human disease. PLoS Genet. 2013;9(8):e1003529. Epub 2013/08/21. doi:  
717 10.1371/journal.pgen.1003529. PubMed PMID: 23950723; PubMed Central PMCID:  
718 PMC3738444.
- 719 20. Morris DR, Geballe AP. Upstream open reading frames as regulators of mRNA  
720 translation. Mol Cell Biol. 2000;20(23):8635-42. Epub 2000/11/14. PubMed PMID:  
721 11073965; PubMed Central PMCID: PMC386464.
- 722 21. Spevak CC, Ivanov IP, Sachs MS. Sequence requirements for ribosome stalling by the  
723 arginine attenuator peptide. J Biol Chem. 2010;285(52):40933-42. Epub 2010/10/05.  
724 doi: 10.1074/jbc.M110.164152. PubMed PMID: 20884617; PubMed Central PMCID:  
725 PMC3003393.
- 726 22. Bhushan S, Meyer H, Starosta AL, Becker T, Mielke T, Berninghausen O, et al.  
727 Structural basis for translational stalling by human cytomegalovirus and fungal  
728 arginine attenuator peptide. Mol Cell. 2010;40(1):138-46. Epub 2010/10/12. doi:  
729 10.1016/j.molcel.2010.09.009. PubMed PMID: 20932481.
- 730 23. Goldman-Pinkovich A, Balno C, Strasser R, Zeituni-Molad M, Bendelak K, Rentsch D, et  
731 al. An Arginine Deprivation Response Pathway Is Induced in *Leishmania* during  
732 Macrophage Invasion. PLoS Pathog. 2016;12(4):e1005494. Epub 2016/04/05. doi:



- 733 10.1371/journal.ppat.1005494. PubMed PMID: 27043018; PubMed Central PMCID:  
734 PMCPMC4846328.
- 735 24. Hatzoglou M, Fernandez J, Yaman I, Closs E. Regulation of cationic amino acid  
736 transport: the story of the CAT-1 transporter. *Annu Rev Nutr.* 2004;24:377-99. Epub  
737 2004/10/06. doi: 10.1146/annurev.nutr.23.011702.073120. PubMed PMID: 15459982.
- 738 25. Augusto L, Amin PH, Wek RC, Sullivan WJ, Jr. Regulation of arginine transport by GCN2  
739 eIF2 kinase is important for replication of the intracellular parasite *Toxoplasma gondii*.  
740 *PLoS Pathog.* 2019;15(6):e1007746. Epub 2019/06/14. doi:  
741 10.1371/journal.ppat.1007746. PubMed PMID: 31194856.
- 742 26. Wu G, Bazer FW, Davis TA, Kim SW, Li P, Marc Rhoads J, et al. Arginine metabolism  
743 and nutrition in growth, health and disease. *Amino Acids.* 2009;37(1):153-68. Epub  
744 2008/11/26. doi: 10.1007/s00726-008-0210-y. PubMed PMID: 19030957; PubMed  
745 Central PMCID: PMCPMC2677116.
- 746 27. Dincel GC, Atmaca HT. Nitric oxide production increases during *Toxoplasma gondii*  
747 encephalitis in mice. *Exp Parasitol.* 2015;156:104-12. Epub 2015/06/28. doi:  
748 10.1016/j.exppara.2015.06.009. PubMed PMID: 26115941.
- 749 28. Yarovinsky F. Innate immunity to *Toxoplasma gondii* infection. *Nat Rev Immunol.*  
750 2014;14(2):109-21. doi: 10.1038/nri3598. PubMed PMID: 24457485.
- 751 29. Hassan MA, Vasquez JJ, Guo-Liang C, Meissner M, Nicolai Siegel T. Comparative  
752 ribosome profiling uncovers a dominant role for translational control in *Toxoplasma*  
753 *gondii*. *BMC Genomics.* 2017;18(1):961. Epub 2017/12/13. doi: 10.1186/s12864-017-  
754 4362-6. PubMed PMID: 29228904; PubMed Central PMCID: PMCPMC5725899.
- 755 30. Werner M, Feller A, Messenguy F, Pierard A. The leader peptide of yeast gene CPA1 is  
756 essential for the translational repression of its expression. *Cell.* 1987;49(6):805-13.  
757 Epub 1987/06/19. doi: 10.1016/0092-8674(87)90618-0. PubMed PMID: 3555844.
- 758 31. Gaba A, Wang Z, Krishnamoorthy T, Hinnebusch AG, Sachs MS. Physical evidence for  
759 distinct mechanisms of translational control by upstream open reading frames. *EMBO*  
760 *J.* 2001;20(22):6453-63. Epub 2001/11/15. doi: 10.1093/emboj/20.22.6453. PubMed  
761 PMID: 11707416; PubMed Central PMCID: PMCPMC125715.
- 762 32. Wang Z, Sachs MS. Ribosome stalling is responsible for arginine-specific translational  
763 attenuation in *Neurospora crassa*. *Mol Cell Biol.* 1997;17(9):4904-13. Epub  
764 1997/09/01. PubMed PMID: 9271370; PubMed Central PMCID: PMCPMC232343.
- 765 33. Saeij JP, Boyle JP, Grigg ME, Arrizabalaga G, Boothroyd JC. Bioluminescence imaging of  
766 *Toxoplasma gondii* infection in living mice reveals dramatic differences between  
767 strains. *Infect Immun.* 2005;73(2):695-702. doi: 10.1128/IAI.73.2.695-702.2005.  
768 PubMed PMID: 15664907; PubMed Central PMCID: PMC547072.
- 769 34. Shen B, Brown KM, Lee TD, Sibley LD. Efficient gene disruption in diverse strains of  
770 *Toxoplasma gondii* using CRISPR/CAS9. *MBio.* 2014;5(3):e01114-14. doi:  
771 10.1128/mBio.01114-14. PubMed PMID: 24825012; PubMed Central PMCID:  
772 PMCPMC4030483.
- 773 35. Sheiner L, Demerly JL, Poulsen N, Beatty WL, Lucas O, Behnke MS, et al. A systematic  
774 screen to discover and analyze apicoplast proteins identifies a conserved and essential  
775 protein import factor. *PLoS Pathog.* 2011;7(12):e1002392. doi:  
776 10.1371/journal.ppat.1002392. PubMed PMID: 22144892.
- 777 36. Fox BA, Falla A, Rommereim LM, Tomita T, Gigley JP, Mercier C, et al. Type II  
778 *Toxoplasma gondii* KU80 knockout strains enable functional analysis of genes required  
779 for cyst development and latent infection. *Eukaryot Cell.* 2011;10(9):1193-206. Epub



- 2011/05/03. doi: 10.1128/EC.00297-10. PubMed PMID: 21531875; PubMed Central  
PMCID: PMCPMC3187049.
37. Striepen B, Soldati D. Genetic manipulation of *Toxoplasma gondii*. In: Weiss LD, Kim K, editors. *Toxoplasma gondii* The Model Apicomplexan - Perspectives and Methods. London: Elsevier; 2007. p. 391-415.
38. van Dooren GG, Reiff SB, Tomova C, Meissner M, Humbel BM, Striepen B. A novel dynamin-related protein has been recruited for apicoplast fission in *Toxoplasma gondii*. *Curr Biol*. 2009;19(4):267-76. doi: 10.1016/j.cub.2008.12.048. PubMed PMID: 19217294.
39. Donald RG, Carter D, Ullman B, Roos DS. Insertional tagging, cloning, and expression of the *Toxoplasma gondii* hypoxanthine-xanthine-guanine phosphoribosyltransferase gene. Use as a selectable marker for stable transformation. *J Biol Chem*. 1996;271(24):14010-9. PubMed PMID: 8662859.
40. Maier AG, Rug M, O'Neill MT, Brown M, Chakravorty S, Szeszak T, et al. Exported proteins required for virulence and rigidity of *Plasmodium falciparum*-infected human erythrocytes. *Cell*. 2008;134(1):48-61. Epub 2008/07/11. doi: 10.1016/j.cell.2008.04.051. PubMed PMID: 18614010; PubMed Central PMCID: PMCPMC2568870.
41. Katris NJ, van Dooren GG, McMillan PJ, Hanssen E, Tilley L, Waller RF. The apical complex provides a regulated gateway for secretion of invasion factors in *Toxoplasma*. *PLoS Pathog*. 2014;10(4):e1004074. doi: 10.1371/journal.ppat.1004074. PubMed PMID: 24743791; PubMed Central PMCID: PMC3990729.
42. Ruijter JM, Ramakers C, Hoogaars WM, Karlen Y, Bakker O, van den Hoff MJ, et al. Amplification efficiency: linking baseline and bias in the analysis of quantitative PCR data. *Nucleic Acids Res*. 2009;37(6):e45. Epub 2009/02/25. doi: 10.1093/nar/gkp045. PubMed PMID: 19237396; PubMed Central PMCID: PMCPMC2665230.
43. Pfaffl MW. A new mathematical model for relative quantification in real-time RT-PCR. *Nucleic Acids Res*. 2001;29(9):e45. Epub 2001/05/09. doi: 10.1093/nar/29.9.e45. PubMed PMID: 11328886; PubMed Central PMCID: PMCPMC55695.
44. van Dooren GG, Yeoh LM, Striepen B, McFadden GI. The Import of Proteins into the Mitochondrion of *Toxoplasma gondii*. *J Biol Chem*. 2016;291(37):19335-50. doi: 10.1074/jbc.M116.725069. PubMed PMID: 27458014.
45. Weiss LM, LaPlace D, Tanowitz HB, Wittner M. Identification of *Toxoplasma gondii* bradyzoite-specific monoclonal antibodies. *J Infect Dis*. 1992;166(1):213-5. Epub 1992/07/01. doi: 10.1093/infdis/166.1.213. PubMed PMID: 1376757.
46. Carey KL, Donahue CG, Ward GE. Identification and molecular characterization of GRA8, a novel, proline-rich, dense granule protein of *Toxoplasma gondii*. *Mol Biochem Parasitol*. 2000;105(1):25-37. PubMed PMID: 10613696.
47. Rajendran E, Kirk K, van Dooren GG. Measuring solute transport in *Toxoplasma gondii* parasites. *Methods Mol Biol*. 2019;*in press*.

821

822 **Figures**

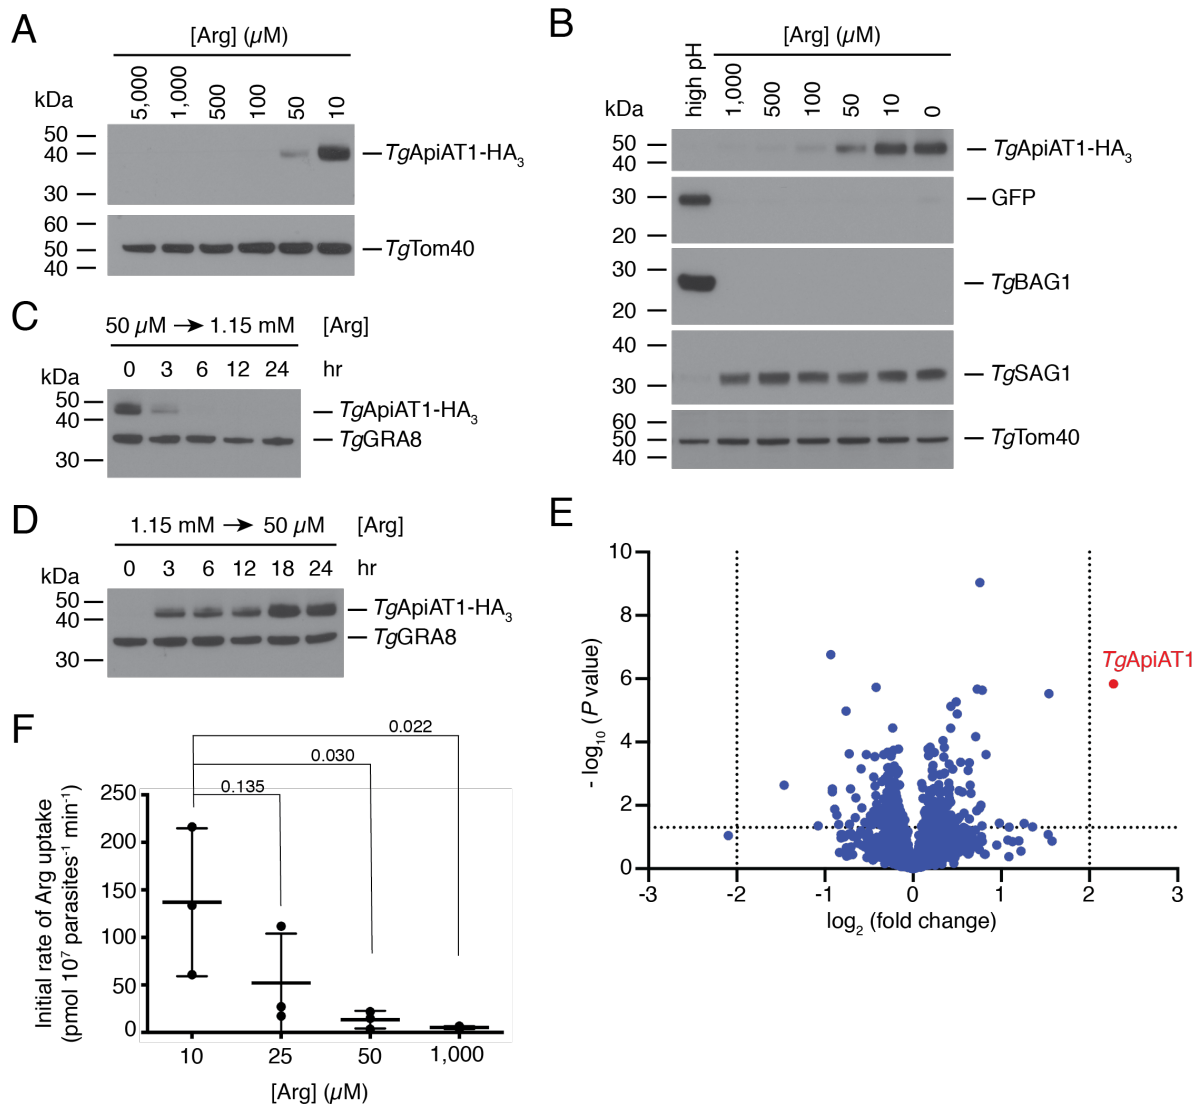

823

824 **Figure 1. *TgApiAT1* protein abundance is regulated by [Arg] in the growth medium.**

825 (A) Western blot of *TgApiAT1*-HA<sub>3</sub> in parasites grown at a range of [Arg] in the growth  
826 medium. *TgTom40* is a loading control. Data are representative of three independent  
827 experiments. (B) Western blot of *TgApiAT1*-HA<sub>3</sub> in Prugnau strain parasites co-expressing  
828 GFP from the bradyzoite-specific *TgLDH2* upstream region. Parasites were grown at a range  
829 of [Arg] in the growth medium, or a high pH to induce bradyzoite formation, and probed with  
830 antibodies against anti-HA (to detect *TgApiAT1*-HA<sub>3</sub>), anti-GFP (to detect GFP expressed  
831 from the bradyzoite-specific promoter *LDH2*), anti-BAG1 (a bradyzoite-specific marker),

832 anti-SAG1 (a tachyzoite-specific marker), and anti-*TgTom40* (a loading control). **(C, D)**  
833 Western blot of *TgApiAT1-HA<sub>3</sub>* in parasites grown at low (50  $\mu$ M; **C**) or high (1.15 mM; **D**)  
834 [Arg] and switched to high or low [Arg], respectively, for the indicated times. *TgGRA8* is a  
835 loading control. Data are representative of three independent experiments. **(E)** Volcano plot  
836 depicting  $\log_2$  fold change vs  $-\log_{10} P$  values of change in protein abundance in a SWATH  
837 MS-based proteomic analysis of parasites grown at 50  $\mu$ M vs 1.15 mM Arg (n = 5). Dotted  
838 lines represent values where  $P = 0.05$  (y axis) or  $\log_2$  fold change is -2 or 2 (x axis). The  
839 *TgApiAT1* data point is depicted in red. **(F)** Initial rate of Arg uptake in parasites cultured in  
840 growth medium containing 10, 25, 50 or 1,000  $\mu$ M Arg. Uptake was measured in 50  $\mu$ M  
841 unlabelled Arg and 0.1  $\mu$ Ci/ml [ $^{14}$ C]Arg. Initial rates were calculated from the initial slope of  
842 fitted single-order exponential curves of timecourse uptake experiments (**Figure S1**). Data  
843 represent the mean  $\pm$  SD from three independent experiments.  $P$  values were calculated using  
844 a one-way ANOVA with Dunnett's multiple comparisons test, comparing the initial uptake  
845 rates to the 10  $\mu$ M condition.

846

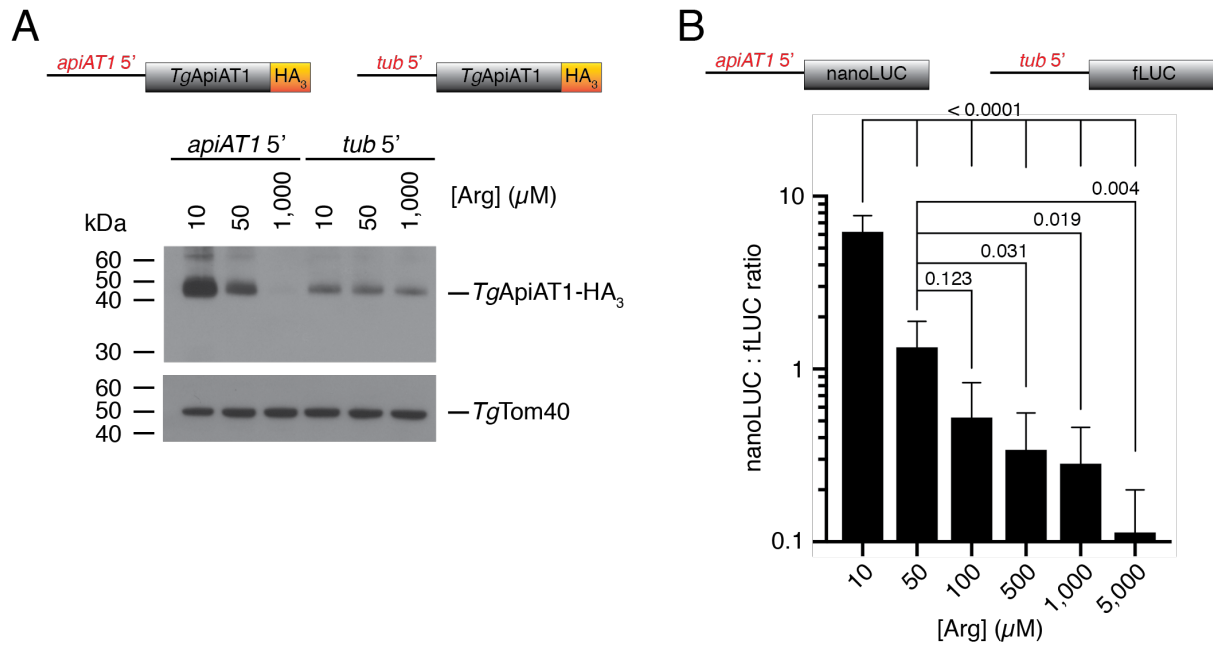

847

848 **Figure 2. Arg-dependent *TgApiAT1* regulation is mediated by the 5' upstream region of**  
 849 **the *TgApiAT1* gene. (A)** Western blot of *TgApiAT1*-HA<sub>3</sub> expressed from the native  
 850 *TgApiAT1* 5' region (*apiAT1* 5') or the  $\alpha$ -tubulin 5' region (*tub* 5'), in parasites grown at a  
 851 range of [Arg] in the growth medium. *TgTom40* is a loading control. Data are representative  
 852 of three independent experiments. **(B)** nanoLUC:fLUC ratio in a parasite strain expressing  
 853 nanoLUC from the *TgApiAT1* 5' region (*apiAT1* 5'-nanoLUC) and fLUC from the  $\alpha$ -tubulin  
 854 5' region (*tub* 5'-fLUC), and grown at a range of [Arg]. Data represent the mean  $\pm$  SD from  
 855 nine independent experiments. *P* values were calculated using a one-way ANOVA with  
 856 Tukey's multiple comparisons test. *P* values not shown were  $> 0.500$ .

857

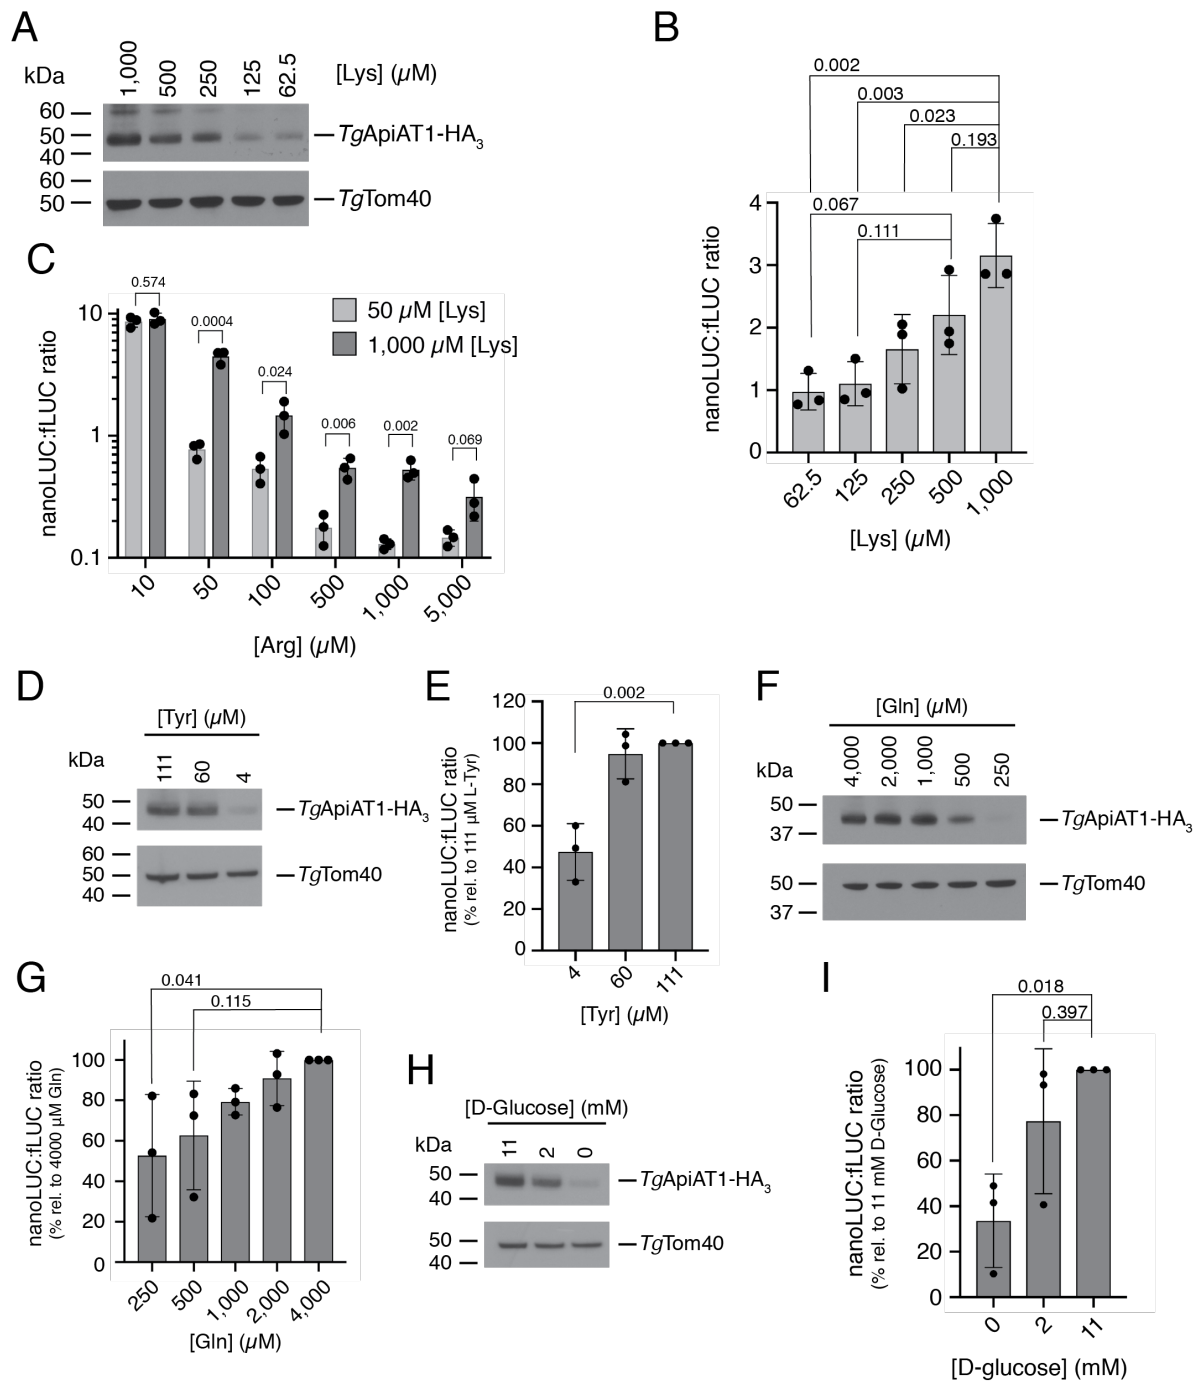

858

859 **Figure 3. *TgApiAT1* regulation is mediated by a range of nutrients. (A, D, F, H) Western**  
 860 **blots of *TgApiAT1*-HA<sub>3</sub> in parasites grown at a range of (A) [Lys], (D) [Tyr], (F) [Gln], or**  
 861 **(H) [D-glucose] in the growth medium. *TgTom40* is a loading control. Data are**  
 862 **representative of three independent experiments. (B) nanoLUC:fLUC ratio in parasites grown**  
 863 **in media containing a range of concentrations of Lys. Data represent the mean  $\pm$  SD from**

864 three independent experiments. *P* values were calculated using a one-way ANOVA with  
865 Tukey's multiple comparisons test. *P* values not shown were > 0.400. **(C)** nanoLUC:fLUC  
866 ratios in parasites grown in media containing a range of [Arg] and either 50  $\mu$ M Lys (light  
867 grey) or 1 mM Lys (dark grey). Data represent the mean  $\pm$  SD from three independent  
868 experiments. *P* values were calculated using unpaired t-tests, not assuming equal variance  
869 (d.f. = 4). **(E, G, I)** nanoLUC:fLUC ratios in parasites grown in media containing a range of  
870 concentrations of **(E)** Tyr, **(G)** Gln, or **(I)** D-glucose. Data represent the mean  $\pm$  SD from  
871 three independent experiments, with the ratios normalised to the condition with the highest  
872 nutrient concentration. *P* values were calculated using a one-way ANOVA with Dunnett's  
873 multiple comparisons test, comparing the normalised nanoLUC:fLUC ratios at each nutrient  
874 concentration to the condition containing the highest concentration tested. *P* values not  
875 shown were > 0.500.

876

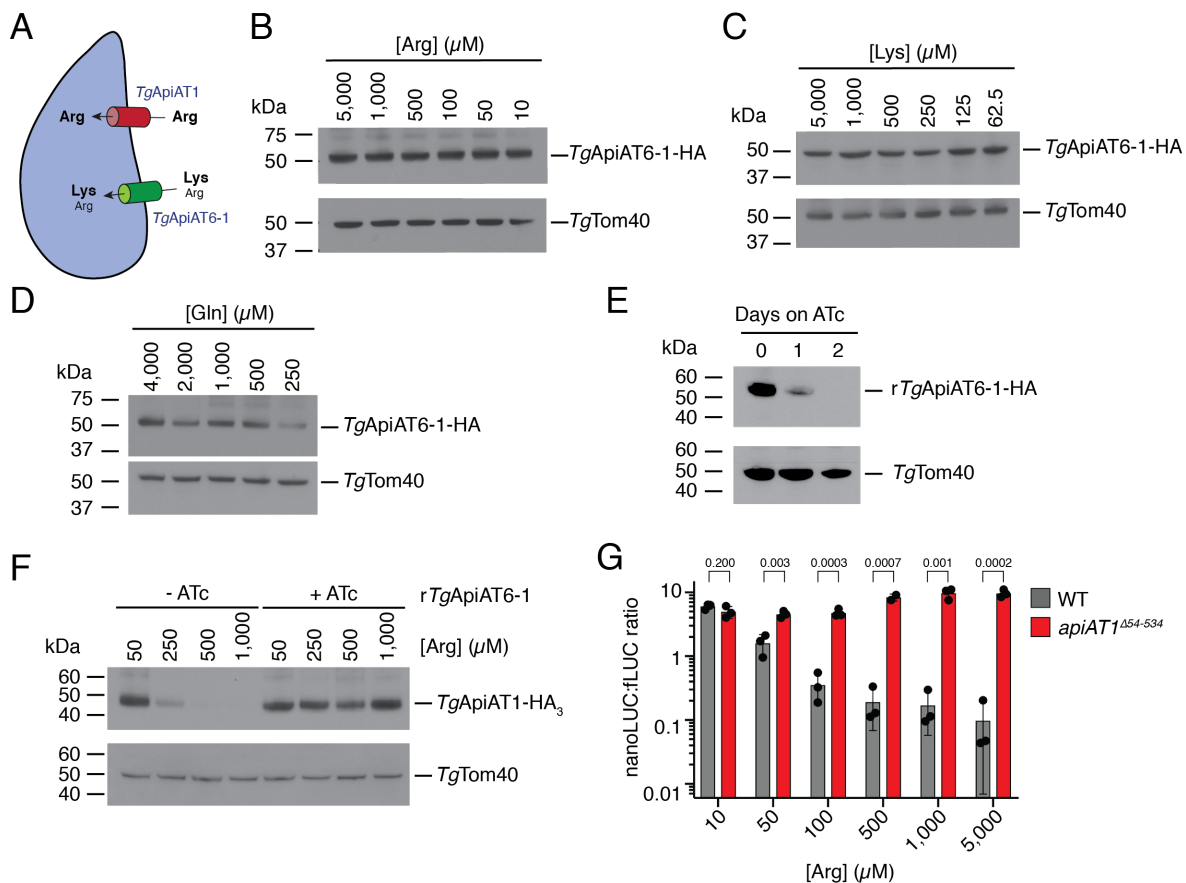

877

878 **Figure 4. *TgApiAT1* regulation is dependent on transporter-mediated uptake of Arg and**

879 **Lys into the parasite. (A) Model of Arg uptake by *T. gondii*. *TgApiAT1* is a selective Arg**

880 **transporter, while *TgApiAT6-1* is a cationic amino acid transporter with a high affinity for Lys**

881 **and a lower affinity for Arg. (B-D) Western blots measuring the abundance of *TgApiAT6-1*-**

882 **HA-expressing parasites grown at a range of (B) [Arg], (C) [Lys], or (D) [Gln] in the growth**

883 **medium. *TgTom40* is a loading control. Data are representative of two independent**

884 **experiments. (E) Western blot measuring the abundance of r*TgApiAT6-1*-HA<sub>3</sub> upon the**

885 **addition of ATc for 0 to 2 days. *TgTom40* is a loading control. Data are representative of three**

886 **independent experiments. (F) Western blot of *TgApiAT1*-HA<sub>3</sub> in r*TgApiAT6-1* parasites**

887 **grown in the absence or presence of ATc, and at a range of [Arg] in the growth medium.**

888 ***TgTom40* is a loading control. Western blots are representative of three independent**

889 **experiments. (G) nanoLUC:fLUC ratios in WT and *apiAT1* <sup>$\Delta$ 54-534</sup> parasites grown at a range of**

890 [Arg]. Data represent the mean  $\pm$  SD from three independent experiments. *P* values were  
891 calculated using unpaired t-tests, not assuming equal variance (d.f. = 4). Note that the data from  
892 the WT experiments were also included in replicates for the data shown in Figure 2B.

893



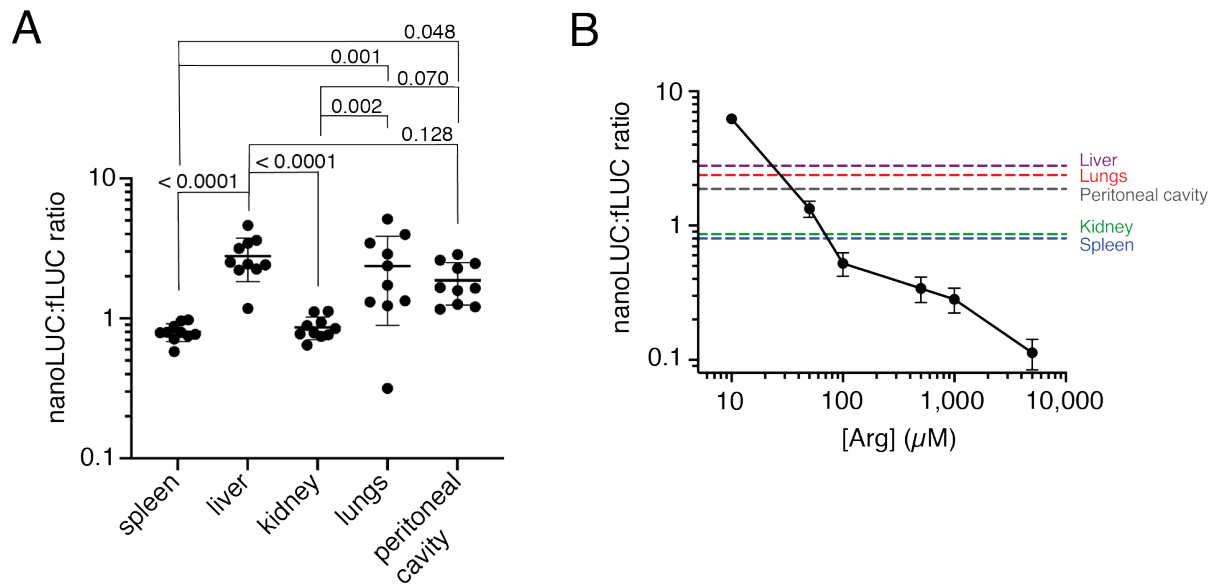

894

895 **Figure 5. *T. gondii* parasites modulate *TgApiAT1* expression *in vivo*. (A)**

896 NanoLUC:fLUC ratios in WT parasites harvested from a range of organs from infected mice.

897 Mice were infected intraperitoneally with  $10^3$  parasites, and euthanised seven days post-

898 infection. Data were derived from two independent experiments with 5 mice each. *P* values

899 were calculated using a one-way ANOVA with Tukey's multiple comparisons test. *P* values

900 not shown were  $> 0.600$ . (B) The mean nanoLUC:fLUC luminescence ratios of WT parasites

901 harvested from various mouse organs and peritoneal cavity in (A) mapped onto the

902 nanoLUC:fLUC luminescence ratios of parasites grown *in vitro* at a range of [Arg] (Figure

903 2B). *In vitro* data represent the mean  $\pm$  s.e.m. from nine independent experiments.

904

905

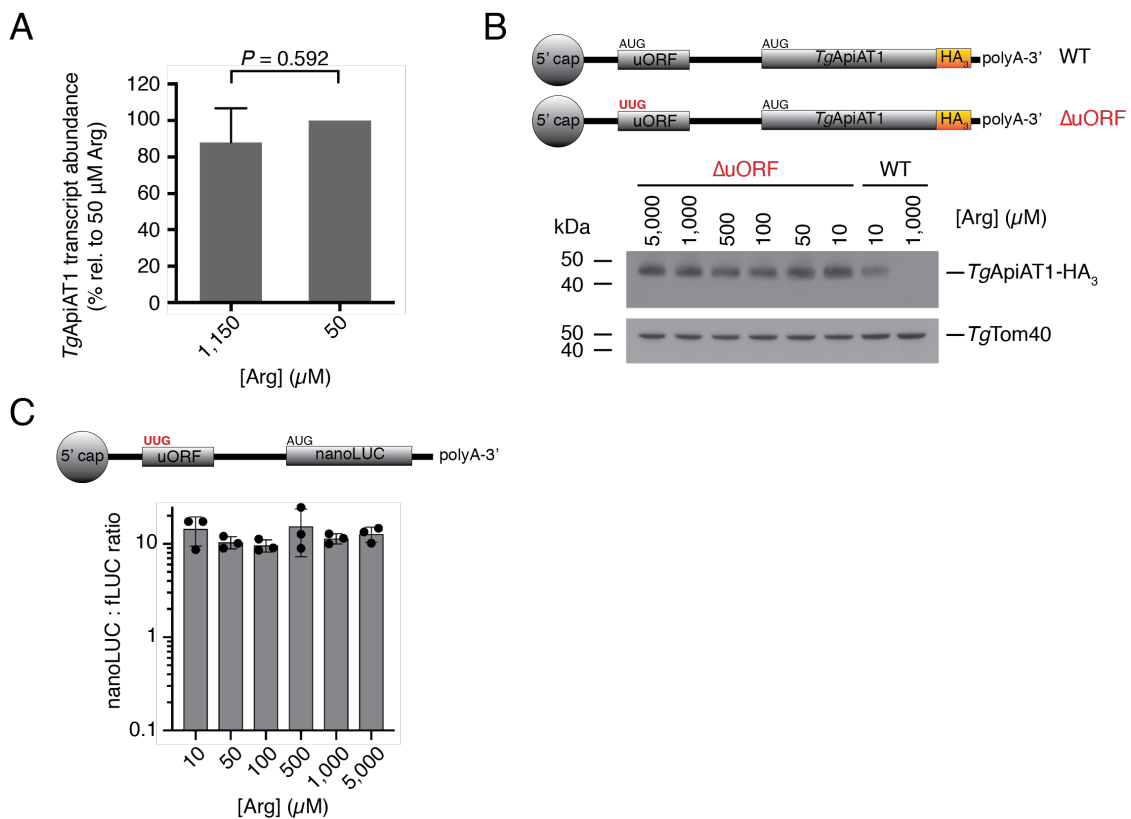

906

907 **Figure 6. Arg-dependent regulation of *TgApiAT1* occurs post-transcriptionally, and is**  
 908 **mediated by an upstream open reading frame. (A)** Relative *TgApiAT1* transcript  
 909 abundance in parasites grown at 50  $\mu$ M and 1.15 mM Arg, normalised to the 50  $\mu$ M  
 910 condition. Data represent the mean  $\pm$  SD from three independent experiments, and the *P*  
 911 value was calculated using a Student's t-test. **(B)** Western blot of  $\Delta$ uORF *TgApiAT1*-HA<sub>3</sub>  
 912 parasites grown at a range of [Arg] in the growth medium, and probed with anti-HA  
 913 antibodies. Western blots of WT *TgApiAT1*-HA<sub>3</sub> parasites cultured in 10  $\mu$ M or 1 mM Arg  
 914 are shown for comparison. *TgTom40* is a loading control. Data are representative of three  
 915 independent experiments. **(C)** nanoLUC:fLUC ratio in a parasite strain expressing nanoLUC  
 916 from the *TgApiAT1* 5' region that lacks the uORF start codon ( $\Delta$ uORF) and fLUC from the  
 917  $\alpha$ -tubulin 5' region, and grown at a range of [Arg]. Data represent the mean  $\pm$  SD from three

918 independent experiments, and were analysed using a one-way ANOVA with Tukey's  
919 multiple comparisons test. All calculated  $P$  values were 0.551 or greater (not shown).

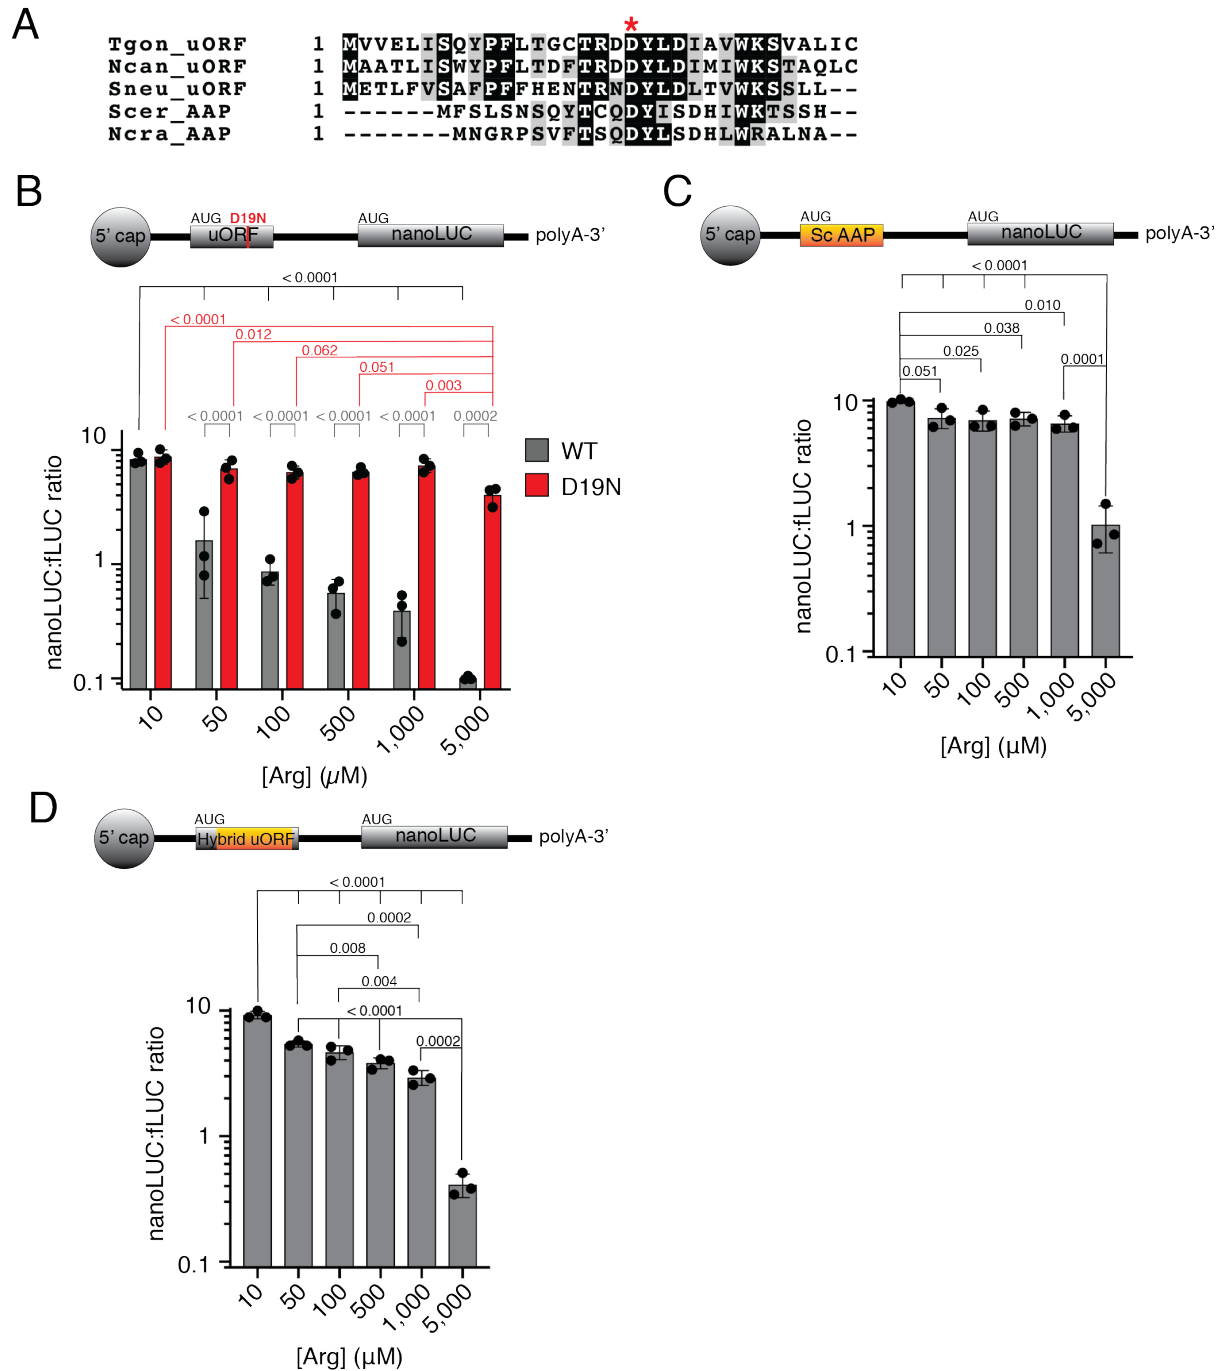

920

921 **Figure 7. The *Tg*ApiAT1 uORF resembles the Arginine Attenuator Peptide of fungi,**  
 922 **and mediates regulation of *Tg*ApiAT1 in a peptide sequence-dependent manner. (A)**

923 Multiple sequence alignment of the uORF-encoded peptide sequences of ApiAT1

924 homologues in *T. gondii* (Tgon\_uORF) and the related coccidian parasites *Neospora caninum*

925 (*Ncan\_uORF*) and *Sarcocystis neurona* (*Sneu\_uORF*), and the arginine attenuator peptides of

926 the fungi *Saccharomyces cerevisiae* (*Scer\_AAP*) and *Neurospora crassa* (*Ncra\_AAP*). The

927 conserved aspartate residue at position 19 of the *TgApiAT1* uORF is highlighted with an  
928 asterisk. **(B)** NanoLUC:fluc ratios in WT and *TgApiAT1*<sup>uORF D19N</sup> (D19N) parasites grown  
929 at a range of [Arg]. Data represent the mean  $\pm$  SD from three independent experiments. *P*  
930 values were calculated using a one-way ANOVA with Tukey's multiple comparisons test. *P*  
931 values not shown were  $> 0.200$ . **(C-D)** NanoLUC:fluc ratios in **(C)** *TgApiAT1*<sup>ScAAP</sup> or **(D)**  
932 *TgApiAT1*<sup>hybrid uORF</sup> parasites grown at a range of [Arg]. Data represent the mean  $\pm$  SD from  
933 three independent experiments. *P* values were calculated using a one-way ANOVA with  
934 Tukey's multiple comparisons test. *P* values not shown were  $> 0.200$ .

935

936

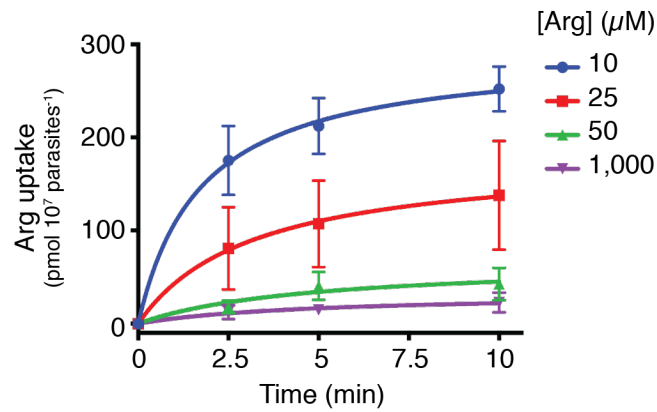

937

938 **Figure S1. Timecourse of Arg uptake in parasites grown in medium containing a range**  
939 **of [Arg].** Uptake of Arg uptake in parasites cultured in growth medium containing 10, 25, 50  
940 and 1,000 μM Arg over 10 min. Uptake was measured in 50 μM unlabelled Arg and 0.1  
941 μCi/ml [<sup>14</sup>C]Arg. Data represent the mean ± s.e.m. from three independent experiments.

942

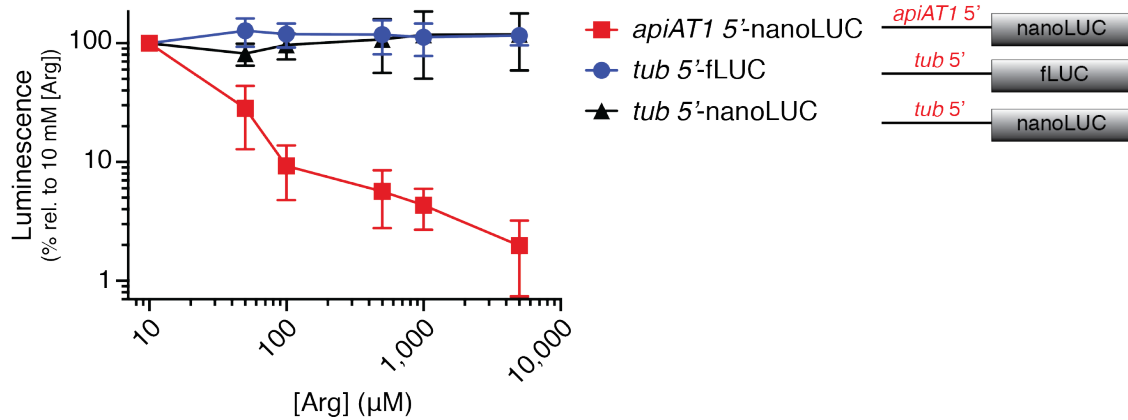

943

944 **Figure S2. Luminescence readings of nanoLUC and fLUC expressing parasites grown**  
945 **at a range of [Arg].** NanoLUC and fLUC luminescence in a parasite strain expressing  
946 nanoLUC from the *TgApiAT1* 5' region (*apiAT1* 5'-nanoLUC; red) and fLUC from the  $\alpha$ -  
947 tubulin 5' region (*tub* 5'-fLUC; blue), or a strain expressing nanoLUC from the  $\alpha$ -tubulin 5'  
948 region (*tub* 5'-nanoLUC; black), grown at a range of [Arg]. Luminescence is expressed as a  
949 percent of the luminescence at the 10  $\mu$ M Arg condition for both nanoLUC and fLUC  
950 measurements. Data points represent the mean  $\pm$  SD of nine independent experiments in the  
951 *apiAT1* 5'-nanoLUC/ *tub* 5'-fLUC strain, and the mean  $\pm$  SD of four independent  
952 experiments in the *tub* 5'-nanoLUC strain.

953

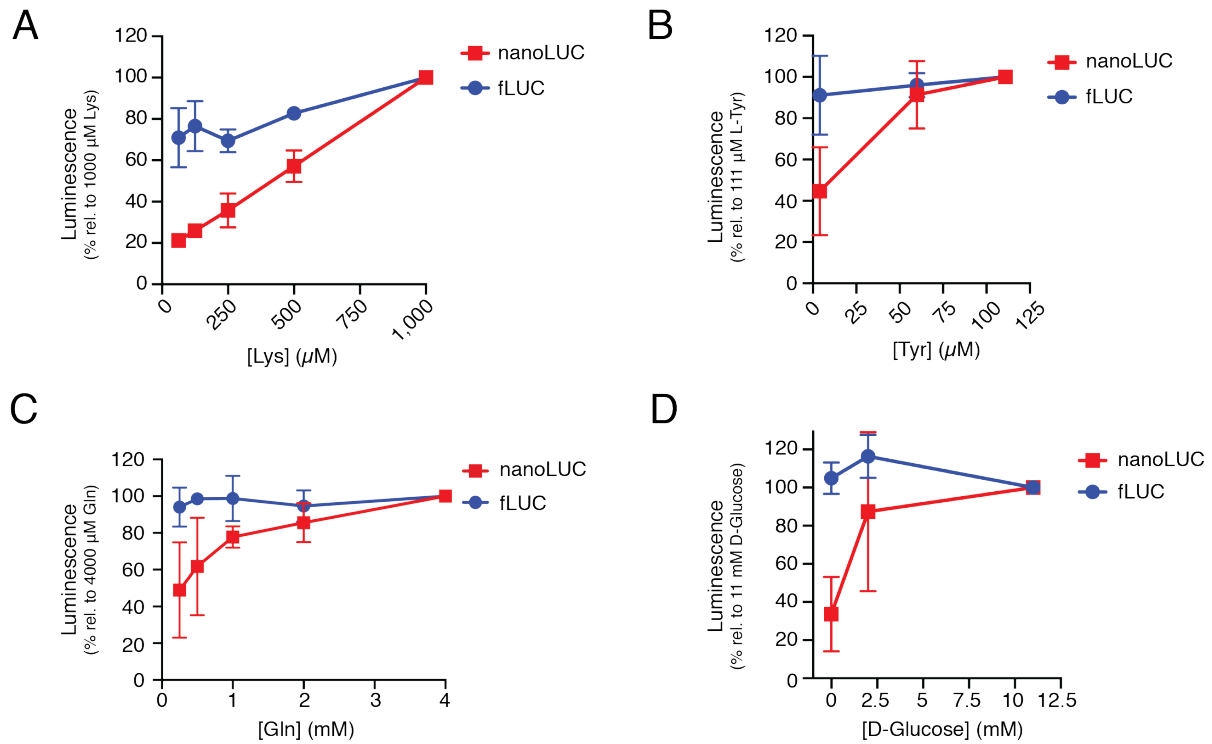

954

955 **Figure S3. The 5' region of *TgApiAT1* mediates regulation in response to a range of**  
956 **nutrients.** NanoLUC and fLUC luminescence readings in a parasite strain expressing  
957 nanoLUC from the *TgApiAT1* 5' region (red) and fLUC from the  $\alpha$ -tubulin (*tub*) 5' region  
958 (blue), and grown at a range of (A) [Lys], (B) [Tyr], (C) [Gln], and (D) D-glucose.  
959 Luminescence is expressed as a percent of the luminescence at the highest tested  
960 concentration of each nutrient for both nanoLUC and fLUC measurements. Data points  
961 represent the mean  $\pm$  SD of three independent experiments for each nutrient.

962



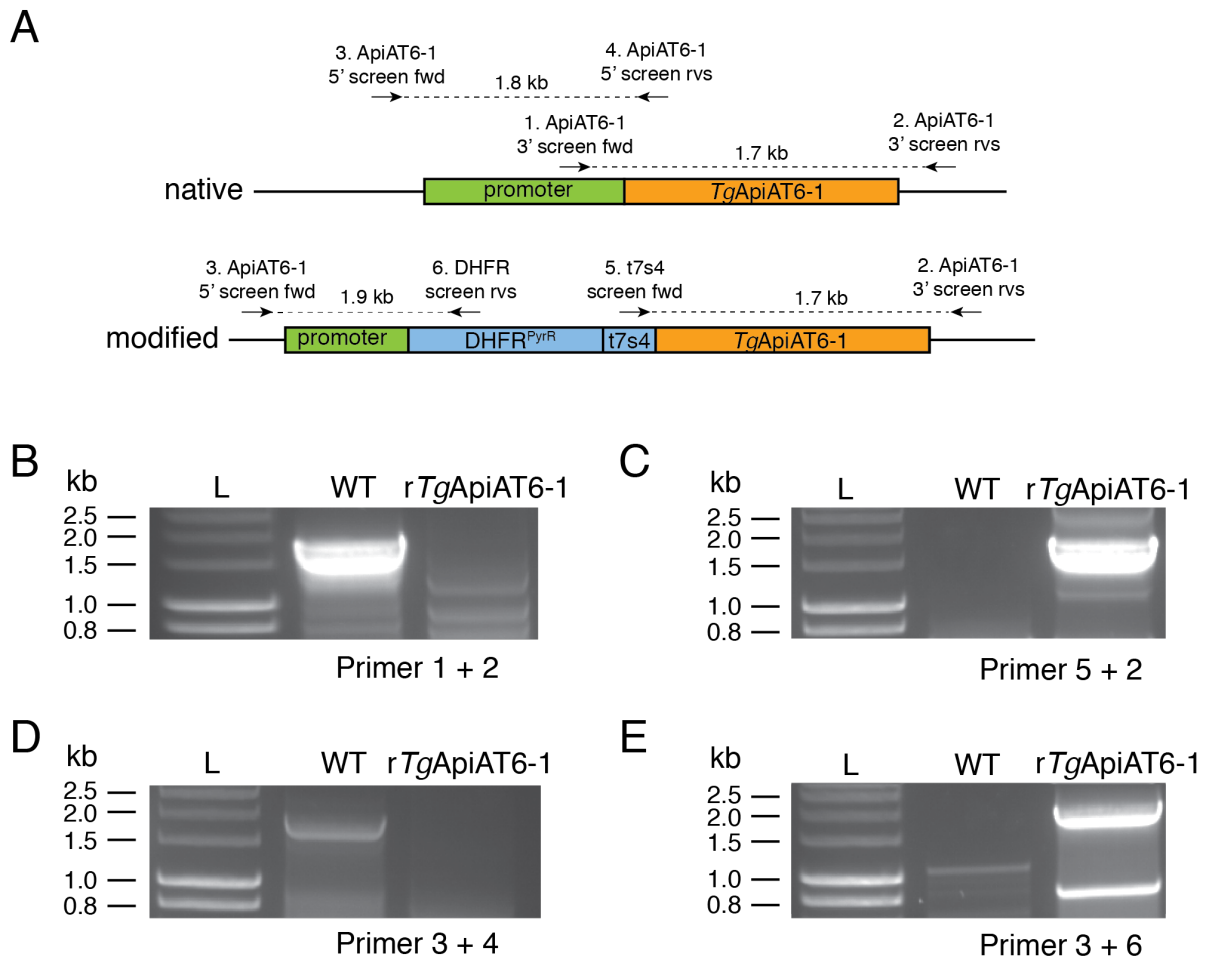

963

964 **Figure S4. Generating an ATc-regulated *TgApiAT6-1* strain.** (A) Schematic depicting the  
 965 promoter replacement strategy to generate the ATc-regulated *TgApiAT6-1* strain  
 966 (*rTgApiAT6-1*), and the positions of screening primers used in subsequent experiments to  
 967 validate successful promoter replacement. The native locus (top) and promoter-replaced locus  
 968 (bottom) are shown. DHFR<sup>PyrR</sup>, pyrimethamine-resistant dihydrofolate reductase cassette;  
 969 t7s4, ATc-regulatable tetO7-sag4 promoter. (B-E), PCR analysis using genomic DNA  
 970 extracted from native RH strain (WT) and modified *rTgApiAT6-1* strain parasites, with  
 971 primers that specifically detect the 3' region of the native locus (B), the 3' region of the  
 972 modified locus (C), the 5' region of the native locus (D), and the 5' region of the modified  
 973 locus (E).

974

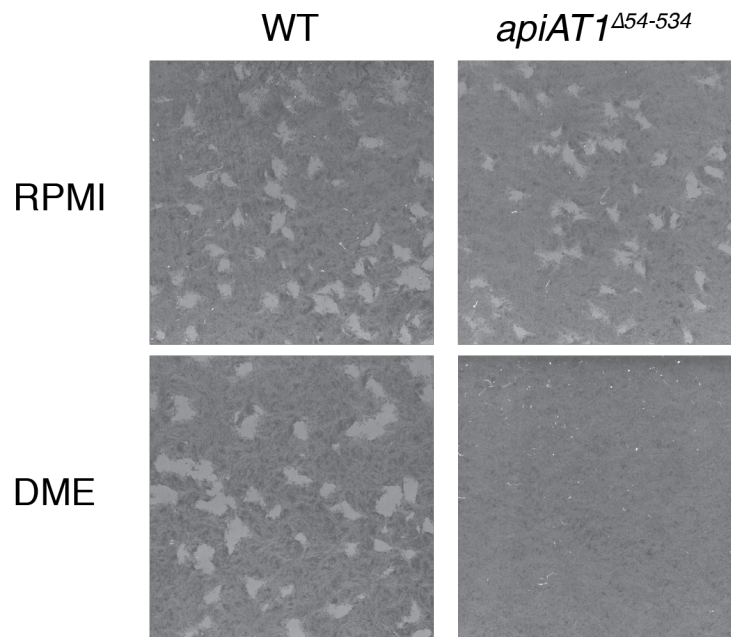

975

976 **Figure S5. Disruption of *TgApiAT1* impairs parasite growth in DME but not RPMI.**

977 500 WT (RHΔ*hxgprt*/*apiAT1* 5'-nanoLUC/*tub*-fLUC; left) or *apiAT1*<sup>Δ54-534</sup>

978 (RHΔ*hxgprt*/*apiAT1* 5'-nanoLUC/*tub*-fLUC/*apiAT1*<sup>Δ54-534</sup>; right) parasites were inoculated

979 into 25 cm<sup>2</sup> tissue culture flasks containing either RPMI (top) or DME (bottom) and cultured

980 for 8 days before staining with crystal violet to reveal plaque formation. Images are from a

981 single experiment, and are representative of three independent experiments.

982

983 **Table S1. Data from the SWATH-MS proteomic analysis. Tab 1.** Averaged data from all  
984 replicates, indicating the ToxoDB ID, the number of peptides used in the analysis of each  
985 protein, *P* value,  $-\log_{10} P$  value, the average fold change in the high vs low [Arg] conditions,  
986 the average fold change in the low vs high [Arg] conditions, the  $\log_2$  fold change in the low  
987 vs high [Arg] condition, and the protein annotation. **Tab 2.** The data from each replicate of  
988 the experiment. H = 1.15 mM Arg; L = 50  $\mu$ M Arg.

989

990 **Table S2.** Sequences of the primers and gBlocks used in this study.

| Oligonucleotide name   | Oligonucleotide sequence (5' to 3')                                                             |
|------------------------|-------------------------------------------------------------------------------------------------|
| ApiAT1 3' gRNA fwd     | GACTTATTTTCATGCTGCATGTTTTAGAGCTAGAAATAGCAAG                                                     |
| Generic rvs            | AACTTGACATCCCCATTAC                                                                             |
| ApiAT1 3' edit fwd     | GAAGACATTCGCAGTCGCGT                                                                            |
| ApiAT1 3' edit rvs     | GCCGATTGAAGAGCCACAAC                                                                            |
| fLUC fwd               | GACTAGATCTGCGATCGCAAAATGGAAGACGCCAAAAACATAAAG                                                   |
| fLUC rvs               | GATCCCTAGGCACGGCGATCTTTCCGCCCTTC                                                                |
| ApiAT1 5' fwd          | GACTACTAGTGAGCAAAACAGTCACTTTAATGTGG                                                             |
| ApiAT1 5' rvs          | CATGGCGATCGCTATCCTGCAGGAACCTCCCGCGGAACAGCA                                                      |
| ApiAT1 5' UTR fwd      | GATCCCTGCAGGAGTTCATTCTTTGAAAATATGCTCCAG                                                         |
| ApiAT1 5' UTR rvs      | CATGGCGATCGCAATGCCAACCGAATGAGATTCAAC                                                            |
| nanoLUC fwd            | CATGGCGATCGCAAAATGGTCTTCACACTCGAAGATTTCTGTG                                                     |
| nanoLUC rvs            | GATCCCTAGGTCCGCTACCACCTGAGCCTCCA                                                                |
| ApiAT6-1 5' flank fwd  | GACTGGGCCCTTCATTTCTCGCAACGTGACAAGC                                                              |
| ApiAT6-1 5' flank rvs  | GACTCATATGCCGACTTGCTTGAAGAACCTGCG                                                               |
| ApiAT6-1 3' flank fwd  | GATCAGATCTAAAATGGCGTCTCGGACTCGAAC                                                               |
| ApiAT6-1 3' flank rvs  | CTAGGCGGCCGCGAGTTCGGAGGACGATCCAGAGG                                                             |
| ApiAT6-1 3' screen fwd | CCGAGTGGACGGACACC                                                                               |
| ApiAT6-1 3' screen rvs | CAGTTCGCTCGGTTGCTTG                                                                             |
| t7s4 screen fwd        | ACGCAGTTCTCGGAAGACG                                                                             |
| ApiAT6-1 5' screen fwd | CTGGAGAAGTGTGTGAGGAGC                                                                           |
| ApiAT6-1 5' screen rvs | GAGTGGAGACGCTGCGACG                                                                             |
| DHFR screen rvs        | GGTGTCTGGATTTACCAGTCAT                                                                          |
| ApiAT1 uORF gRNA fwd   | GACGACCATTTTTTCGGACGGTTTTAGAGCTAGAAATAGCAAG                                                     |
| ApiAT1 ΔuORF fwd       | TCCAGTCTTTTCAGTAAAGGAGAACCAATCTGTGTGCGGGCGCGTCCGAAAAATTGGTCGTC<br>GAATTGATTTTCGAGTACCCTTTCTTGA  |
| ApiAT1 ΔuORF rvs       | TCAAGAAAGGGTACTGCGAAATCAATTCGACGACCAATTTTTTCGGACGCGCCCGCACACAGA<br>TTGGTTCTCCTTTACTGAAAAGACTGGA |
| uORF D19N fwd          | CACTAGGGATaACTACCTCGATATTG                                                                      |
| uORF D19N rvs          | CAACCAGTCAAGAAAGGG                                                                              |
| Tub 5' fwd             | GACTACTAGTGCATACATTATACGAAGTTATTGCTAGAATG                                                       |
| Tub 5' rvs             | CATGGCGATCGCAAAAGGGAATTCAGAAAAAATGC                                                             |
| ApiAT1 qrt int fwd     | CTCTCGACGATTCCTTGTCTGCT                                                                         |
| ApiAT1 qrt int fwd     | GAAATACTGGGCCACCACGCT                                                                           |
| ApiAT1 qrt 3' UTR fwd  | CATGCGTTGTGGCTCTTCAATC                                                                          |
| ApiAT1 qrt 3' UTR rvs  | CCAACTGTTTCTGCATCGTCGT                                                                          |
| Tub qrt fwd            | CGACGCCTCAACACCTTCTTT                                                                           |
| Tub qrt rvs            | AGTTGTTTCGAGCATCCTCTTTC                                                                         |
| GAPDH qrt fwd          | TGGTGTCCGTGCTGCGAT                                                                              |
| GAPDH qrt rvs          | AGCTTGCCGTCTTGTGGC                                                                              |

|                                                 |                                                                                                                                                                                                                                                                                                                                                                                                                                                                                                                                                                                                                                                                                                                                                         |
|-------------------------------------------------|---------------------------------------------------------------------------------------------------------------------------------------------------------------------------------------------------------------------------------------------------------------------------------------------------------------------------------------------------------------------------------------------------------------------------------------------------------------------------------------------------------------------------------------------------------------------------------------------------------------------------------------------------------------------------------------------------------------------------------------------------------|
| <i>Tg</i> ApiAT1-HA <sub>3</sub> gBlock         | GAAGACATTCGCAGTCGCGTGCTGGAACCTCAAAGCAGCACACGCTGCAGATGCAGCAGGAG<br>GTGGTAGCGGTGGAGGTAGTTACCCGTACGACGTCCCGGACTACGCTGGCTATCCCTATGAT<br>GTGCCGATTATGCGTATCCTACGATGTTCCAGATTATGCCTGAAAATAAGTCCCGCACCTG<br>GCGCATGCGTGTGGCTCTCAATCGGC                                                                                                                                                                                                                                                                                                                                                                                                                                                                                                                         |
| <i>Tg</i> ApiAT1/ $\Delta$ uORF 5'UTR<br>gBlock | AGTTCATTCTTTGAAAATATGCTCCAGCGTCATCGTTTACTGCTTTCAGAATTGCAAAGCACTT<br>TCGAACGATTTTACAAGGTGTAAGACGGGTATTCTCAAGGTGGCGCAGCCAGAGTTCCTAG<br>CAGCTTGCGAACGCACCACCACGTGGAATTGCTCCGGGAGAGCTATCCTGTTGCCTGCTTCC<br>GCTTTGTGGCCATCTTAGATTTTTCAATTTCTCAGCGCTCCAGTCTTTTCAGTAAAGGAGA<br>ACCAATCTGTGTGCGGCCGCGTCCGAAAAATGGTCGTCGAATTGATTCGCAGTACCCTTTC<br>TTGACTGGTTGCACTAGGGATGACTACCTCGATATTGCGGTCTGGAAGTCCGTAGCTCTCATA<br>TGCTAACTTCTCAAAGACATATTTTTGTTGTGCTGTGTTGGCACTATTGTGTTCTTAA<br>TTATTTAGGTGTTGTTTTTTCGTTACCCATCAGTGGACGCGCCGGCTTTCGCTGCGTGGCGTG<br>GCCGTCTCCAGCTTCTGCGTTGTCCAATAACACCGGTGCTGTCTATTTCTGCGCTCATTTCGC<br>AAGAATCGCGGAGAGTTTCATCTCTTTGCCGTATCTTGCTGTTTTCTTAAGAATCGAAGAG<br>GCTATCTTCGCTGCGACTTAGCCTTCTCGGTCCGCCCTTGTGTTGAATCTCATTGCTGTTG<br>GCATT |
| <i>Tg</i> ApiAT1/ScAAP uORF<br>5'UTR gBlock     | AGTTCATTCTTTGAAAATATGCTCCAGCGTCATCGTTTACTGCTTTCAGAATTGCAAAGCACTT<br>TCGAACGATTTTACAAGGTGTAAGACGGGTATTCTCAAGGTGGCGCAGCCAGAGTTCCTAG<br>CAGCTTGCGAACGCACCACCACGTGGAATTGCTCCGGGAGAGCTATCCTGTTGCCTGCTTCC<br>GCTTTGTGGCCATCTTAGATTTTTCAATTTCTCAGCGCTCCAGTCTTTTCAGTAAAGGAGA<br>ACCAATCTGTGTGCGGCCGCGTCCGAAAAATGGTTAGCTTATCGAATCTCAATACACCTGC<br>CAAGACTACATATCTGACCACATCTGAAAACTAGCTCCCACTAACTTCTCAAAGACAT<br>ATTTTTGTTGTGCTGTGTTGGCACTATTGTGTTCTTAATTATTAGGTGTTGTTTTTCGT<br>TACCCATCAGTGGACGCGCCGGCTTTCGCTGCTGGCGTGGCCGTCTCCAGCTTCTGCGTTGT<br>CCAATAACACCGGTGCTGTCTATTTCTGCGCTCATTTCGCAAGAATCGCGGAGAGTTTCATCT<br>CTTTGCCGTATCTTGCTGTTTTCTTAAGAATCGAAGAGGCTATCTTCGCTGCGACTTAGCC<br>TTTCTCGGTCCGCCCTTGTGTTGAATCTCATTGCTGTTGGCATT                                |
| <i>Tg</i> ApiAT1/hybrid uORF<br>5'UTR gBlock    | AGTTCATTCTTTGAAAATATGCTCCAGCGTCATCGTTTACTGCTTTCAGAATTGCAAAGCACTT<br>TCGAACGATTTTACAAGGTGTAAGACGGGTATTCTCAAGGTGGCGCAGCCAGAGTTCCTAG<br>CAGCTTGCGAACGCACCACCACGTGGAATTGCTCCGGGAGAGCTATCCTGTTGCCTGCTTCC<br>GCTTTGTGGCCATCTTAGATTTTTCAATTTCTCAGCGCTCCAGTCTTTTCAGTAAAGGAGA<br>ACCAATCTGTGTGCGGCCGCGTCCGAAAAATGGTCGTCGAATTGATTCGTTTAGCTTATCG<br>AACTCTCAATACACTGCCAAGACTACATATCTGACCACATCTGAAAACTAGCTCCACATA<br>TGCTAACTTCTCAAAGACATATTTTTGTTGTGCTGTGTTGGCACTATTGTGTTCTTAA<br>TTATTTAGGTGTTGTTTTTTCGTTACCCATCAGTGGACGCGCCGGCTTTCGCTGCGTGGCGTG<br>GCCGTCTCCAGCTTCTGCGTTGTCCAATAACACCGGTGCTGTCTATTTCTGCGCTCATTTCGC<br>AAGAATCGCGGAGAGTTTCATCTCTTTGCCGTATCTTGCTGTTTTCTTAAGAATCGAAGAG<br>GCTATCTTCGCTGCGACTTAGCCTTCTCGGTCCGCCCTTGTGTTGAATCTCATTGCTGTTG<br>GCATT    |
